# Supplementary material
Source: publisher figshare collection journal article supplement (https://rs.figshare.com/ndownloader/files/31315255)
Supplement: Supplementary file 1 [file 31315255]

country	species	top_10_percent	artificial_terrestrial_habitat	covid_hotspot	map_panel
Afghanistan	Mustela nivalis	0	0	0	NA
Afghanistan	Mustela erminea	1	0	0	A
Afghanistan	Capra falconeri	0	0	0	NA
Afghanistan	Ursus arctos	1	1	0	AB
Afghanistan	Ursus thibetanus	1	1	0	AB
Afghanistan	Martes foina	0	1	0	NA
Afghanistan	Prionailurus bengalensis	0	1	0	NA
Afghanistan	Meriones meridianus	0	0	0	NA
Afghanistan	Suncus murinus	0	0	0	NA
Afghanistan	Felis margarita	0	0	0	NA
Afghanistan	Paradoxurus hermaphroditus	0	0	0	NA
Afghanistan	Panthera pardus	0	0	0	NA
Afghanistan	Canis lupus	1	1	0	AB
Afghanistan	Canis aureus	0	1	0	NA
Afghanistan	Neodon juldaschi	0	0	0	NA
Afghanistan	Mustela eversmanii	0	0	0	NA
Afghanistan	Sus scrofa	0	1	0	NA
Afghanistan	Petaurista petaurista	0	0	0	NA
Afghanistan	Semnopithecus schistaceus	1	0	0	A
Afghanistan	Mustela altaica	0	0	0	NA
Afghanistan	Lynx lynx	0	0	0	NA
Afghanistan	Vulpes cana	0	0	0	NA
Afghanistan	Macaca mulatta	1	1	0	AB
Afghanistan	Mellivora capensis	0	0	0	NA
Afghanistan	Capra sibirica	0	0	0	NA
Afghanistan	Alticola argentatus	0	0	0	NA
Afghanistan	Ovis ammon	0	0	0	NA
Afghanistan	Ochotona rufescens	0	1	0	NA
Afghanistan	Lutra lutra	0	0	0	NA
Afghanistan	Mustela sibirica	1	0	0	A
Afghanistan	Apodemus rusiges	0	0	0	NA
Afghanistan	Apodemus pallipes	0	0	0	NA
Afghanistan	Blanfordimys bucharensis	0	0	0	NA
Afghanistan	Gazella bennettii	1	0	0	A
Afghanistan	Martes flavigula	0	0	0	NA
Afghanistan	Gerbillus aquilus	0	0	0	NA
Afghanistan	Funambulus pennantii	0	0	0	NA
Afghanistan	Hystrix indica	0	1	0	NA
Afghanistan	Vulpes vulpes	1	1	0	AB
Afghanistan	Rousettus leschenaultii	0	0	0	NA
Afghanistan	Gerbillus nanus	0	1	0	NA
Afghanistan	Caracal caracal	0	0	0	NA
Afghanistan	Felis silvestris	0	0	0	NA
Afghanistan	Gazella subgutturosa	1	0	0	A
Afghanistan	Hyaena hyaena	0	0	0	NA
Albania	Apodemus flavicollis	0	0	1	NA
Albania	Mustela nivalis	0	1	1	NA
Albania	Ursus arctos	1	1	1	ABC
Albania	Martes foina	0	1	1	NA
Albania	Lepus europaeus	0	1	1	NA
Albania	Arvicola amphibius	0	1	1	NA
Albania	Capreolus capreolus	0	1	1	NA
Albania	Dama dama	0	1	1	NA
Albania	Rupicapra rupicapra	0	1	1	NA
Albania	Canis lupus	1	1	1	ABC
Albania	Canis aureus	0	1	1	NA
Albania	Sus scrofa	0	1	1	NA
Albania	Lynx lynx	0	0	1	NA
Albania	Mustela putorius	1	1	1	ABC
Albania	Microtus subterraneus	0	1	1	NA
Albania	Microtus arvalis	0	1	1	NA
Albania	Apodemus sylvaticus	0	1	1	NA
Albania	Sorex alpinus	0	0	0	NA
Albania	Lutra lutra	0	0	1	NA
Albania	Martes martes	0	1	1	NA
Albania	Micromys minutus	0	0	1	NA
Albania	Vulpes vulpes	1	1	1	ABC
Albania	Felis silvestris	0	0	1	NA
Algeria	Mustela nivalis	0	1	1	NA
Algeria	Hystrix cristata	0	1	1	NA
Algeria	Nanger dama	1	0	1	NA
Algeria	Herpestes ichneumon	0	0	1	NA
Algeria	Vulpes zerda	0	0	1	NA
Algeria	Felis margarita	0	0	1	NA
Algeria	Gazella cuvieri	0	0	1	NA
Algeria	Panthera pardus	0	0	1	NA
Algeria	Sus scrofa	0	1	1	NA
Algeria	Arvicanthis niloticus	0	0	1	NA
Algeria	Ictonyx libycus	0	1	1	NA
Algeria	Gazella dorcas	1	0	1	NA
Algeria	Cervus elaphus	0	0	0	NA
Algeria	Mellivora capensis	0	0	1	NA
Algeria	Apodemus sylvaticus	0	1	1	NA
Algeria	Gazella leptoceros	0	0	1	NA
Algeria	Lutra lutra	0	0	1	NA
Algeria	Jaculus jaculus	0	0	1	NA
Algeria	Ammotragus lervia	0	0	1	NA
Algeria	Vulpes vulpes	1	1	1	ABC
Algeria	Gerbillus gerbillus	0	0	1	NA
Algeria	Gerbillus nanus	0	0	1	NA
Algeria	Caracal caracal	0	0	1	NA
Algeria	Macaca sylvanus	1	0	0	A
Algeria	Felis silvestris	0	0	1	NA
Algeria	Hyaena hyaena	0	0	1	NA
Andorra	Apodemus flavicollis	0	0	0	NA
Andorra	Mustela nivalis	0	0	0	NA
Andorra	Mustela erminea	1	0	0	A
Andorra	Ursus arctos	1	0	0	A
Andorra	Rupicapra pyrenaica	0	0	0	NA
Andorra	Martes foina	0	0	0	NA
Andorra	Lepus europaeus	0	0	0	NA
Andorra	Capreolus capreolus	0	0	0	NA
Andorra	Dama dama	0	0	0	NA
Andorra	Canis lupus	1	0	0	A
Andorra	Sus scrofa	0	0	0	NA
Andorra	Ondatra zibethicus	0	0	0	NA
Andorra	Mustela putorius	1	0	0	A
Andorra	Microtus arvalis	0	0	0	NA
Andorra	Cervus elaphus	0	0	0	NA
Andorra	Apodemus sylvaticus	0	0	0	NA
Andorra	Lutra lutra	0	0	0	NA
Andorra	Martes martes	0	0	0	NA
Andorra	Micromys minutus	0	0	0	NA
Andorra	Vulpes vulpes	1	0	0	A
Andorra	Microtus agrestis	0	0	0	NA
Andorra	Felis silvestris	0	0	0	NA
Angola	Protoxerus stangeri	0	1	0	NA
Angola	Funisciurus anerythrus	0	0	0	NA
Angola	Graphiurus lorraineus	0	0	0	NA
Angola	Panthera leo	0	0	0	NA
Angola	Genetta servalina	0	0	0	NA
Angola	Giraffa camelopardalis	1	0	0	A
Angola	Miopithecus talapoin	1	1	0	AB
Angola	Tragelaphus strepsiceros	0	1	0	NA
Angola	Connochaetes taurinus	0	0	0	NA
Angola	Lissonycteris angolensis	0	1	0	NA
Angola	Raphicerus campestris	0	0	0	NA
Angola	Micropteropus pusillus	0	1	0	NA
Angola	Herpestes ichneumon	0	0	0	NA
Angola	Funisciurus congicus	0	0	0	NA
Angola	Cercopithecus mitis	1	1	0	AB
Angola	Otolemur crassicaudatus	0	1	0	NA
Angola	Paraxerus poensis	0	1	0	NA
Angola	Syncerus caffer	0	0	0	NA
Angola	Hippotragus niger	0	0	0	NA
Angola	Dendrohyrax dorsalis	1	0	0	A
Angola	Panthera pardus	0	0	0	NA
Angola	Ceratotherium simum	0	0	0	NA
Angola	Diceros bicornis	0	0	0	NA
Angola	Potamochoerus porcus	0	1	0	NA
Angola	Chlorocebus cynosuros	0	1	0	NA
Angola	Cephalophus dorsalis	0	1	0	NA
Angola	Aepyceros melampus	0	0	0	NA
Angola	Poiana richardsonii	0	0	0	NA
Angola	Lophocebus aterrimus	1	0	0	A
Angola	Papio ursinus	0	0	0	NA
Angola	Ourebia ourebi	0	0	0	NA
Angola	Potamogale velox	0	0	0	NA
Angola	Mylomys dybowskii	0	0	0	NA
Angola	Alcelaphus buselaphus	1	1	0	AB
Angola	Funisciurus pyrropus	0	1	0	NA
Angola	Hyemoschus aquaticus	0	0	0	NA
Angola	Atherurus africanus	0	1	0	NA
Angola	Pan troglodytes	1	0	0	A
Angola	Tragelaphus spekii	0	0	0	NA
Angola	Kobus vardonii	0	0	0	NA
Angola	Cercopithecus ascanius	1	0	0	A
Angola	Nandinia binotata	0	1	0	NA
Angola	Herpestes naso	0	0	0	NA
Angola	Mellivora capensis	0	0	0	NA
Angola	Damaliscus lunatus	0	0	0	NA
Angola	Redunca arundinum	0	0	0	NA
Angola	Kobus leche	0	0	0	NA
Angola	Anomalurus beecrofti	0	1	0	NA
Angola	Cephalophus nigrifrons	0	0	0	NA
Angola	Crocuta crocuta	1	0	0	A
Angola	Atilax paludinosus	0	0	0	NA
Angola	Thallomys paedulcus	0	0	0	NA
Angola	Potamochoerus larvatus	0	1	0	NA
Angola	Miopithecus ogouensis	0	1	0	NA
Angola	Cercopithecus neglectus	1	0	0	A
Angola	Gorilla gorilla	1	0	0	A
Angola	Cephalophus leucogaster	0	0	0	NA
Angola	Euoticus elegantulus	0	1	0	NA
Angola	Saccolaimus peli	0	0	0	NA
Angola	Galago moholi	0	0	0	NA
Angola	Colobus angolensis	0	0	0	NA
Angola	Dendrohyrax arboreus	0	0	0	NA
Angola	Antidorcas marsupialis	0	0	0	NA
Angola	Madoqua kirkii	0	0	0	NA
Angola	Tragelaphus scriptus	0	1	0	NA
Angola	Hipposideros cyclops	0	0	0	NA
Angola	Otocyon megalotis	0	0	0	NA
Angola	Hypsignathus monstrosus	0	0	0	NA
Angola	Bdeogale nigripes	0	0	0	NA
Angola	Kobus ellipsiprymnus	0	0	0	NA
Angola	Pelomys campanae	0	1	0	NA
Angola	Epomophorus grandis	0	0	0	NA
Angola	Myonycteris torquata	0	1	0	NA
Angola	Heliosciurus gambianus	0	1	0	NA
Angola	Cricetomys emini	0	0	0	NA
Angola	Funisciurus lemniscatus	0	0	0	NA
Angola	Cercopithecus cephus	1	1	0	AB
Angola	Epomops franqueti	0	1	0	NA
Angola	Caracal caracal	0	0	0	NA
Angola	Crossarchus ansorgei	0	0	0	NA
Angola	Felis silvestris	0	0	0	NA
Angola	Equus zebra	0	0	0	NA
Angola	Cephalophus silvicultor	0	1	0	NA
Angola	Petrodromus tetradactylus	0	0	0	NA
Angola	Hippotragus equinus	0	0	0	NA
Antigua and Barbuda	Brachyphylla cavernarum	0	0	0	NA
Antigua and Barbuda	Monophyllus plethodon	0	0	0	NA
Antigua and Barbuda	Artibeus jamaicensis	0	0	0	NA
Argentina	Castor canadensis	0	0	1	NA
Argentina	Cynomops abrasus	0	0	1	NA
Argentina	Mazama nana	0	0	1	NA
Argentina	Micronycteris megalotis	0	1	1	NA
Argentina	Panthera onca	1	1	1	ABC
Argentina	Saccopteryx leptura	0	0	0	NA
Argentina	Lepus europaeus	0	1	1	NA
Argentina	Alouatta guariba	0	0	1	NA
Argentina	Blastocerus dichotomus	0	0	1	NA
Argentina	Mazama gouazoubira	0	1	1	NA
Argentina	Hippocamelus antisensis	0	0	1	NA
Argentina	Hippocamelus bisulcus	0	1	1	NA
Argentina	Pecari tajacu	0	1	1	NA
Argentina	Vicugna vicugna	0	0	1	NA
Argentina	Procyon cancrivorus	0	0	1	NA
Argentina	Caluromys lanatus	0	1	1	NA
Argentina	Leopardus wiedii	0	0	1	NA
Argentina	Alouatta caraya	0	0	1	NA
Argentina	Diaemus youngi	0	1	1	NA
Argentina	Puma concolor	0	0	1	NA
Argentina	Lagostomus maximus	0	0	1	NA
Argentina	Tayassu pecari	1	0	1	NA
Argentina	Artibeus lituratus	0	1	1	NA
Argentina	Aotus azarae	0	0	1	NA
Argentina	Coendou prehensilis	0	0	1	NA
Argentina	Myrmecophaga tridactyla	0	1	1	NA
Argentina	Eira barbara	0	0	1	NA
Argentina	Ctenomys conoveri	0	0	0	NA
Argentina	Speothos venaticus	0	1	1	NA
Argentina	Tamandua tetradactyla	0	0	1	NA
Argentina	Mazama americana	0	0	1	NA
Argentina	Pudu puda	0	0	1	NA
Argentina	Chrysocyon brachyurus	0	1	1	NA
Argentina	Eptesicus chiriquinus	0	0	1	NA
Argentina	Cuniculus paca	0	0	1	NA
Argentina	Tremarctos ornatus	0	0	0	NA
Argentina	Tapirus terrestris	0	0	1	NA
Argentina	Leopardus tigrinus	0	0	1	NA
Argentina	Ozotoceros bezoarticus	0	1	1	NA
Armenia	Apodemus flavicollis	0	0	1	NA
Armenia	Mustela nivalis	0	1	1	NA
Armenia	Ursus arctos	1	1	1	ABC
Armenia	Martes foina	0	1	1	NA
Armenia	Lepus europaeus	0	1	1	NA
Armenia	Arvicola amphibius	0	1	1	NA
Armenia	Capreolus capreolus	0	1	1	NA
Armenia	Apodemus ponticus	0	1	1	NA
Armenia	Panthera pardus	0	0	1	NA
Armenia	Canis lupus	1	1	1	ABC
Armenia	Canis aureus	0	1	1	NA
Armenia	Sus scrofa	0	1	1	NA
Armenia	Lynx lynx	0	0	1	NA
Armenia	Microtus arvalis	0	1	1	NA
Armenia	Meriones tristrami	0	1	1	NA
Armenia	Cervus elaphus	0	1	1	NA
Armenia	Nyctereutes procyonoides	1	0	0	A
Armenia	Lutra lutra	0	0	1	NA
Armenia	Martes martes	0	1	1	NA
Armenia	Hystrix indica	0	1	1	NA
Armenia	Vulpes vulpes	1	1	1	ABC
Armenia	Microtus socialis	0	0	1	NA
Armenia	Felis silvestris	0	0	1	NA
Armenia	Meriones dahli	0	0	0	NA
Armenia	Hyaena hyaena	0	0	1	NA
Australia	Pteropus alecto	1	1	0	AB
Australia	Macropus parryi	0	1	0	NA
Australia	Macropus bernardus	0	0	0	NA
Australia	Hipposideros ater	0	0	0	NA
Australia	Wyulda squamicaudata	0	0	0	NA
Australia	Bettongia tropica	0	0	0	NA
Australia	Taphozous australis	0	0	0	NA
Australia	Rhinonicteris aurantia	0	0	0	NA
Australia	Pteropus conspicillatus	1	0	0	A
Australia	Saccolaimus saccolaimus	1	0	0	A
Australia	Mesembriomys gouldii	0	0	0	NA
Australia	Hipposideros diadema	0	0	0	NA
Australia	Lepus europaeus	0	1	0	NA
Australia	Xeromys myoides	0	0	0	NA
Australia	Chalinolobus nigrogriseus	0	1	0	NA
Australia	Uromys caudimaculatus	0	0	0	NA
Australia	Echymipera rufescens	0	0	0	NA
Australia	Pteropus scapulatus	0	1	0	NA
Australia	Macroglossus minimus	1	0	0	A
Australia	Macropus agilis	0	0	0	NA
Australia	Rattus exulans	0	0	0	NA
Australia	Saccolaimus mixtus	0	0	0	NA
Australia	Hydromys chrysogaster	0	0	0	NA
Australia	Murina florium	0	0	0	NA
Australia	Dasyurus hallucatus	0	0	0	NA
Australia	Hipposideros cervinus	0	0	0	NA
Australia	Pteropus macrotis	0	0	0	NA
Australia	Bos javanicus	1	0	0	A
Australia	Macropus irma	0	0	0	NA
Australia	Zyzomys maini	0	0	0	NA
Australia	Pseudochirops archeri	0	0	0	NA
Australia	Petrogale brachyotis	0	0	0	NA
Australia	Phalanger mimicus	0	0	0	NA
Australia	Conilurus penicillatus	0	0	0	NA
Australia	Thylogale stigmatica	0	0	0	NA
Australia	Onychogalea fraenata	0	0	0	NA
Australia	Melomys capensis	0	0	0	NA
Australia	Sminthopsis virginiae	0	0	0	NA
Australia	Taphozous georgianus	0	0	0	NA
Australia	Isoodon auratus	0	0	0	NA
Australia	Cercartetus caudatus	0	0	0	NA
Australia	Petrogale sharmani	0	0	0	NA
Australia	Syconycteris australis	0	0	0	NA
Australia	Pogonomys macrourus	0	0	0	NA
Australia	Macropus rufogriseus	0	1	0	NA
Australia	Rattus leucopus	0	0	0	NA
Australia	Mesembriomys macrurus	0	0	0	NA
Australia	Dobsonia moluccensis	1	0	0	A
Australia	Crocidura trichura	0	0	0	NA
Australia	Rhinolophus philippinensis	0	0	0	NA
Australia	Pteropus melanotus	1	0	0	A
Australia	Nyctimene robinsoni	0	1	0	NA
Australia	Sminthopsis archeri	0	0	0	NA
Australia	Hipposideros inornatus	0	0	0	NA
Australia	Petrogale rothschildi	0	0	0	NA
Australia	Notomys aquilo	0	0	0	NA
Australia	Petrogale burbidgei	0	0	0	NA
Australia	Taphozous kapalgensis	0	0	0	NA
Australia	Macropus antilopinus	0	0	0	NA
Australia	Dendrolagus bennettianus	0	0	0	NA
Australia	Chaerephon jobensis	0	0	0	NA
Australia	Petrogale godmani	0	0	0	NA
Australia	Vulpes vulpes	1	1	0	AB
Australia	Scotorepens sanborni	0	0	0	NA
Australia	Notoryctes caurinus	0	0	0	NA
Australia	Petrogale coenensis	0	0	0	NA
Australia	Dactylopsila trivirgata	0	0	0	NA
Australia	Rattus colletti	0	0	0	NA
Australia	Notoryctes typhlops	0	0	0	NA
Australia	Onychogalea unguifera	0	0	0	NA
Australia	Petaurus australis	0	0	0	NA
Australia	Petrogale persephone	0	0	0	NA
Australia	Pipistrellus adamsi	0	0	0	NA
Australia	Petropseudes dahli	0	0	0	NA
Australia	Notomys alexis	0	0	0	NA
Australia	Taphozous troughtoni	0	0	0	NA
Australia	Macroderma gigas	0	0	0	NA
Australia	Petaurus gracilis	0	0	0	NA
Australia	Petrogale mareeba	0	0	0	NA
Australia	Melomys burtoni	0	1	0	NA
Australia	Dendrolagus lumholtzi	0	0	0	NA
Austria	Apodemus flavicollis	0	0	1	NA
Austria	Mustela nivalis	0	1	1	NA
Austria	Cricetus cricetus	0	1	1	NA
Austria	Mustela erminea	1	1	1	ABC
Austria	Ursus arctos	1	1	1	ABC
Austria	Martes foina	0	1	1	NA
Austria	Lepus europaeus	0	1	1	NA
Austria	Arvicola amphibius	0	1	1	NA
Austria	Capreolus capreolus	0	1	1	NA
Austria	Dama dama	0	1	1	NA
Austria	Rupicapra rupicapra	0	1	1	NA
Austria	Canis lupus	1	1	1	ABC
Austria	Canis aureus	0	0	0	NA
Austria	Mustela eversmanii	0	0	0	NA
Austria	Sus scrofa	0	1	1	NA
Austria	Ondatra zibethicus	0	0	1	NA
Austria	Lynx lynx	0	0	0	NA
Austria	Mustela putorius	1	1	1	ABC
Austria	Lepus timidus	0	1	1	NA
Austria	Microtus subterraneus	0	1	1	NA
Austria	Microtus arvalis	0	1	1	NA
Austria	Castor fiber	0	0	0	NA
Austria	Cervus elaphus	0	1	1	NA
Austria	Apodemus sylvaticus	0	1	1	NA
Austria	Sorex alpinus	0	1	1	NA
Austria	Nyctereutes procyonoides	1	1	1	ABC
Austria	Lutra lutra	0	0	1	NA
Austria	Capra ibex	0	0	1	NA
Austria	Martes martes	0	1	1	NA
Austria	Micromys minutus	0	1	1	NA
Austria	Vulpes vulpes	1	1	1	ABC
Austria	Microtus agrestis	0	1	1	NA
Austria	Alces alces	0	0	0	NA
Austria	Microtus oeconomus	0	0	0	NA
Austria	Felis silvestris	0	0	1	NA
Azerbaijan	Apodemus flavicollis	0	0	0	NA
Azerbaijan	Chionomys gud	0	0	1	NA
Azerbaijan	Mustela nivalis	0	1	1	NA
Azerbaijan	Ursus arctos	1	1	1	ABC
Azerbaijan	Martes foina	0	1	1	NA
Azerbaijan	Lepus europaeus	0	1	1	NA
Azerbaijan	Arvicola amphibius	0	1	1	NA
Azerbaijan	Capreolus capreolus	0	1	1	NA
Azerbaijan	Rupicapra rupicapra	0	1	1	NA
Azerbaijan	Apodemus ponticus	0	1	1	NA
Azerbaijan	Panthera pardus	0	0	1	NA
Azerbaijan	Canis lupus	1	1	1	ABC
Azerbaijan	Canis aureus	0	1	1	NA
Azerbaijan	Sus scrofa	0	1	1	NA
Azerbaijan	Lynx lynx	0	0	1	NA
Azerbaijan	Microtus arvalis	0	1	1	NA
Azerbaijan	Meriones tristrami	0	1	1	NA
Azerbaijan	Cervus elaphus	0	1	1	NA
Azerbaijan	Nyctereutes procyonoides	1	1	1	ABC
Azerbaijan	Lutra lutra	0	0	1	NA
Azerbaijan	Martes martes	0	1	1	NA
Azerbaijan	Micromys minutus	0	1	1	NA
Azerbaijan	Apodemus hyrcanicus	0	0	1	NA
Azerbaijan	Hystrix indica	0	1	1	NA
Azerbaijan	Vulpes vulpes	1	1	1	ABC
Azerbaijan	Microtus socialis	0	0	1	NA
Azerbaijan	Felis silvestris	0	0	1	NA
Azerbaijan	Gazella subgutturosa	1	0	1	NA
Azerbaijan	Meriones dahli	0	0	0	NA
Azerbaijan	Hyaena hyaena	0	0	1	NA
Bahrain	Suncus murinus	0	0	0	NA
Bahrain	Vulpes vulpes	1	0	0	A
Bahrain	Gerbillus nanus	0	0	0	NA
Bangladesh	Semnopithecus entellus	1	1	1	ABC
Bangladesh	Trachypithecus pileatus	1	0	1	NA
Bangladesh	Mustela kathiah	0	0	0	NA
Bangladesh	Hipposideros armiger	0	1	1	NA
Bangladesh	Chaerephon plicatus	0	0	0	NA
Bangladesh	Hipposideros ater	0	0	0	NA
Bangladesh	Nycticebus bengalensis	1	0	1	NA
Bangladesh	Petaurista philippensis	0	0	0	NA
Bangladesh	Catopuma temminckii	0	0	1	NA
Bangladesh	Rusa unicolor	0	1	1	NA
Bangladesh	Saccolaimus saccolaimus	1	1	1	ABC
Bangladesh	Tupaia belangeri	0	1	1	NA
Bangladesh	Ursus thibetanus	1	1	1	ABC
Bangladesh	Macaca arctoides	1	0	1	NA
Bangladesh	Axis porcinus	1	0	0	A
Bangladesh	Prionailurus bengalensis	0	1	1	NA
Bangladesh	Coelops frithii	0	0	1	NA
Bangladesh	Suncus murinus	0	1	1	NA
Bangladesh	Rhinolophus affinis	0	1	1	NA
Bangladesh	Kerivoula picta	0	1	1	NA
Bangladesh	Pardofelis marmorata	0	0	0	NA
Bangladesh	Hystrix brachyura	0	0	0	NA
Bangladesh	Viverricula indica	0	1	1	NA
Bangladesh	Manis pentadactyla	0	0	1	NA
Bangladesh	Herpestes urva	1	1	1	ABC
Bangladesh	Leopoldamys sabanus	0	0	0	NA
Bangladesh	Melogale personata	0	1	1	NA
Bangladesh	Macroglossus sobrinus	0	1	1	NA
Bangladesh	Callosciurus erythraeus	0	0	1	NA
Bangladesh	Aonyx cinereus	0	0	1	NA
Bangladesh	Rhinolophus rouxii	0	0	0	NA
Bangladesh	Miniopterus magnater	0	0	0	NA
Bangladesh	Rattus exulans	0	1	1	NA
Bangladesh	Helarctos malayanus	1	1	1	ABC
Bangladesh	Macaca assamensis	0	0	1	NA
Bangladesh	Megaderma spasma	0	1	1	NA
Bangladesh	Eonycteris spelaea	0	0	0	NA
Bangladesh	Paradoxurus hermaphroditus	0	1	1	NA
Bangladesh	Rhinoceros unicornis	1	0	1	NA
Bangladesh	Panthera pardus	0	0	1	NA
Bangladesh	Canis lupus	1	0	0	A
Bangladesh	Canis aureus	0	1	1	NA
Bangladesh	Sus scrofa	0	1	1	NA
Bangladesh	Cynopterus brachyotis	1	1	1	ABC
Bangladesh	Petaurista petaurista	0	0	1	NA
Bangladesh	Rhizomys pruinosus	0	0	0	NA
Bangladesh	Vulpes bengalensis	0	0	1	NA
Bangladesh	Arctictis binturong	0	1	1	NA
Bangladesh	Macaca fascicularis	1	0	1	NA
Bangladesh	Hipposideros larvatus	0	1	1	NA
Bangladesh	Mus terricolor	0	0	0	NA
Bangladesh	Kerivoula hardwickii	0	1	1	NA
Bangladesh	Ratufa bicolor	0	0	0	NA
Bangladesh	Madromys blanfordi	0	0	1	NA
Bangladesh	Petaurista nobilis	0	0	0	NA
Bangladesh	Capricornis thar	0	1	1	NA
Bangladesh	Taphozous melanopogon	0	1	1	NA
Bangladesh	Macaca mulatta	1	1	1	ABC
Bangladesh	Prionailurus viverrinus	0	1	1	NA
Bangladesh	Cynopterus sphinx	0	1	1	NA
Bangladesh	Scotozous dormeri	0	1	1	NA
Bangladesh	Rhinolophus macrotis	0	0	1	NA
Bangladesh	Melogale moschata	1	0	0	A
Bangladesh	Hylopetes phayrei	0	0	0	NA
Bangladesh	Arctogalidia trivirgata	0	0	0	NA
Bangladesh	Macaca leonina	1	0	1	NA
Bangladesh	Neofelis nebulosa	0	0	1	NA
Bangladesh	Lutra lutra	0	0	0	NA
Bangladesh	Panthera tigris	1	0	1	NA
Bangladesh	Caprolagus hispidus	0	0	1	NA
Bangladesh	Rattus andamanensis	0	1	1	NA
Bangladesh	Hipposideros galeritus	0	1	1	NA
Bangladesh	Elephas maximus	0	1	1	NA
Bangladesh	Leopoldamys edwardsi	0	0	1	NA
Bangladesh	Martes flavigula	0	1	1	NA
Bangladesh	Harpiocephalus harpia	0	0	1	NA
Bangladesh	Lutrogale perspicillata	0	0	1	NA
Bangladesh	Golunda ellioti	0	1	1	NA
Bangladesh	Taphozous longimanus	0	1	1	NA
Bangladesh	Viverra zibetha	0	1	1	NA
Bangladesh	Petaurista magnificus	0	0	0	NA
Bangladesh	Arctonyx collaris	0	1	1	NA
Bangladesh	Hipposideros lankadiva	0	0	1	NA
Bangladesh	Vulpes vulpes	1	1	1	ABC
Bangladesh	Rousettus leschenaultii	0	1	1	NA
Bangladesh	Pteropus giganteus	0	1	1	NA
Bangladesh	Rhinolophus pearsonii	0	1	1	NA
Bangladesh	Prionodon pardicolor	0	0	0	NA
Bangladesh	Axis axis	1	1	1	ABC
Bangladesh	Atherurus macrourus	0	0	1	NA
Bangladesh	Berylmys bowersi	0	0	0	NA
Bangladesh	Melursus ursinus	1	0	0	A
Bangladesh	Trachypithecus phayrei	1	1	1	ABC
Bangladesh	Cuon alpinus	0	0	1	NA
Bangladesh	Cannomys badius	0	0	0	NA
Bangladesh	Mustela strigidorsa	0	0	0	NA
Bangladesh	Otomops wroughtoni	0	0	0	NA
Barbados	Brachyphylla cavernarum	0	0	0	NA
Barbados	Lepus europaeus	0	0	0	NA
Barbados	Myotis martiniquensis	0	0	0	NA
Barbados	Monophyllus plethodon	0	0	0	NA
Belarus	Apodemus flavicollis	0	0	1	NA
Belarus	Mustela nivalis	0	1	1	NA
Belarus	Cricetus cricetus	0	0	0	NA
Belarus	Mustela erminea	1	1	1	ABC
Belarus	Ursus arctos	1	1	1	ABC
Belarus	Martes foina	0	1	1	NA
Belarus	Lepus europaeus	0	1	1	NA
Belarus	Arvicola amphibius	0	1	1	NA
Belarus	Capreolus capreolus	0	1	1	NA
Belarus	Dama dama	0	1	1	NA
Belarus	Canis lupus	1	1	1	ABC
Belarus	Mustela eversmanii	0	1	1	NA
Belarus	Sus scrofa	0	1	1	NA
Belarus	Ondatra zibethicus	0	0	1	NA
Belarus	Lynx lynx	0	0	1	NA
Belarus	Mustela putorius	1	1	1	ABC
Belarus	Lepus timidus	0	1	1	NA
Belarus	Microtus subterraneus	0	1	1	NA
Belarus	Microtus arvalis	0	1	1	NA
Belarus	Castor fiber	0	1	1	NA
Belarus	Cervus elaphus	0	1	1	NA
Belarus	Apodemus sylvaticus	0	1	1	NA
Belarus	Nyctereutes procyonoides	1	1	1	ABC
Belarus	Lutra lutra	0	0	1	NA
Belarus	Martes martes	0	1	1	NA
Belarus	Micromys minutus	0	1	1	NA
Belarus	Bison bonasus	0	0	0	NA
Belarus	Vulpes vulpes	1	1	1	ABC
Belarus	Microtus agrestis	0	1	1	NA
Belarus	Alces alces	0	1	1	NA
Belarus	Microtus oeconomus	0	1	1	NA
Belarus	Felis silvestris	0	0	1	NA
Belgium	Castor canadensis	0	0	1	NA
Belgium	Apodemus flavicollis	0	0	1	NA
Belgium	Mustela nivalis	0	1	1	NA
Belgium	Cricetus cricetus	0	0	0	NA
Belgium	Mustela erminea	1	1	1	ABC
Belgium	Martes foina	0	1	1	NA
Belgium	Lepus europaeus	0	1	1	NA
Belgium	Arvicola amphibius	0	1	1	NA
Belgium	Capreolus capreolus	0	1	1	NA
Belgium	Dama dama	0	1	1	NA
Belgium	Sus scrofa	0	1	1	NA
Belgium	Ondatra zibethicus	0	0	1	NA
Belgium	Mustela putorius	1	1	1	ABC
Belgium	Microtus subterraneus	0	1	1	NA
Belgium	Microtus arvalis	0	1	1	NA
Belgium	Castor fiber	0	1	1	NA
Belgium	Cervus elaphus	0	1	1	NA
Belgium	Apodemus sylvaticus	0	1	1	NA
Belgium	Nyctereutes procyonoides	1	1	1	ABC
Belgium	Phoca vitulina	0	0	0	NA
Belgium	Martes martes	0	1	1	NA
Belgium	Micromys minutus	0	1	1	NA
Belgium	Vulpes vulpes	1	1	1	ABC
Belgium	Microtus agrestis	0	1	1	NA
Belgium	Microtus oeconomus	0	0	0	NA
Belgium	Felis silvestris	0	0	0	NA
Belize	Panthera onca	1	1	0	AB
Belize	Potos flavus	1	0	0	A
Belize	Rhogeessa aeneus	0	0	0	NA
Belize	Phyllostomus hastatus	0	1	0	NA
Belize	Trinycteris nicefori	0	1	0	NA
Belize	Saccopteryx leptura	0	1	0	NA
Belize	Tonatia saurophila	0	1	0	NA
Belize	Ateles geoffroyi	1	0	0	A
Belize	Rhynchonycteris naso	0	0	0	NA
Belize	Nasua narica	0	0	0	NA
Belize	Cyclopes didactylus	0	0	0	NA
Belize	Canis latrans	0	1	0	NA
Belize	Urocyon cinereoargenteus	0	1	0	NA
Belize	Oryzomys couesi	0	0	0	NA
Belize	Sciurus yucatanensis	0	1	0	NA
Belize	Peropteryx macrotis	0	1	0	NA
Belize	Mimon cozumelae	0	0	0	NA
Belize	Bauerus dubiaquercus	0	1	0	NA
Belize	Lampronycteris brachyotis	0	1	0	NA
Belize	Galictis vittata	0	1	0	NA
Belize	Trachops cirrhosus	0	1	0	NA
Belize	Phyllostomus discolor	0	1	0	NA
Belize	Pecari tajacu	0	1	0	NA
Belize	Mustela frenata	0	0	0	NA
Belize	Tamandua mexicana	0	0	0	NA
Belize	Lichonycteris obscura	0	1	0	NA
Belize	Nyctomys sumichrasti	0	0	0	NA
Belize	Leopardus wiedii	0	0	0	NA
Belize	Dasyprocta punctata	0	1	0	NA
Belize	Puma concolor	0	0	0	NA
Belize	Tayassu pecari	1	0	0	A
Belize	Artibeus lituratus	0	1	0	NA
Belize	Lophostoma brasiliense	0	1	0	NA
Belize	Alouatta pigra	1	0	0	A
Belize	Myrmecophaga tridactyla	0	0	0	NA
Belize	Eira barbara	0	0	0	NA
Belize	Cabassous centralis	0	0	0	NA
Belize	Peromyscus yucatanicus	0	0	0	NA
Belize	Artibeus jamaicensis	0	1	0	NA
Belize	Tapirus bairdii	0	0	0	NA
Belize	Conepatus semistriatus	0	0	0	NA
Belize	Otonyctomys hatti	0	0	0	NA
Belize	Heteromys gaumeri	0	0	0	NA
Belize	Centronycteris centralis	0	0	0	NA
Belize	Lophostoma evotis	0	0	0	NA
Belize	Cuniculus paca	0	0	0	NA
Belize	Mazama temama	1	1	0	AB
Belize	Caluromys derbianus	0	1	0	NA
Belize	Choeroniscus godmani	0	0	0	NA
Belize	Odocoileus virginianus	1	1	0	AB
Belize	Phylloderma stenops	0	0	0	NA
Belize	Orthogeomys hispidus	0	1	0	NA
Belize	Mazama pandora	1	1	0	AB
Belize	Bassariscus sumichrasti	0	0	0	NA
Benin	Protoxerus stangeri	0	1	0	NA
Benin	Funisciurus anerythrus	0	0	0	NA
Benin	Cercopithecus mona	1	1	0	AB
Benin	Epomophorus gambianus	0	0	0	NA
Benin	Hystrix cristata	0	1	0	NA
Benin	Panthera leo	0	0	0	NA
Benin	Tragelaphus eurycerus	0	1	0	NA
Benin	Epomops buettikoferi	0	1	0	NA
Benin	Lissonycteris angolensis	0	1	0	NA
Benin	Micropteropus pusillus	0	1	0	NA
Benin	Herpestes ichneumon	0	0	0	NA
Benin	Syncerus caffer	0	0	0	NA
Benin	Praomys derooi	0	1	0	NA
Benin	Erythrocebus patas	1	1	0	AB
Benin	Panthera pardus	0	0	0	NA
Benin	Potamochoerus porcus	0	1	0	NA
Benin	Colobus vellerosus	1	0	0	A
Benin	Vulpes pallida	0	1	0	NA
Benin	Myopterus daubentonii	0	0	0	NA
Benin	Genetta thierryi	0	0	0	NA
Benin	Praomys tullbergi	0	0	0	NA
Benin	Arvicanthis niloticus	0	1	0	NA
Benin	Nycteris gambiensis	0	1	0	NA
Benin	Steatomys cuppedius	0	0	0	NA
Benin	Ourebia ourebi	0	0	0	NA
Benin	Steatomys caurinus	0	0	0	NA
Benin	Alcelaphus buselaphus	1	1	0	AB
Benin	Ictonyx libycus	0	1	0	NA
Benin	Eudorcas rufifrons	0	0	0	NA
Benin	Atherurus africanus	0	1	0	NA
Benin	Cephalophus niger	0	1	0	NA
Benin	Tragelaphus spekii	0	0	0	NA
Benin	Chlorocebus tantalus	1	1	0	AB
Benin	Crocidura grandiceps	0	0	0	NA
Benin	Perodicticus potto	0	0	0	NA
Benin	Nandinia binotata	0	1	0	NA
Benin	Mellivora capensis	0	0	0	NA
Benin	Damaliscus lunatus	0	0	0	NA
Benin	Heliosciurus rufobrachium	0	1	0	NA
Benin	Anomalurus beecrofti	0	1	0	NA
Benin	Crocuta crocuta	1	0	0	A
Benin	Atilax paludinosus	0	0	0	NA
Benin	Papio anubis	1	1	0	AB
Benin	Kobus kob	0	0	0	NA
Benin	Xerus erythropus	0	1	0	NA
Benin	Mops trevori	0	0	0	NA
Benin	Saccolaimus peli	0	0	0	NA
Benin	Funisciurus leucogenys	0	0	0	NA
Benin	Nanonycteris veldkampii	0	1	0	NA
Benin	Hipposideros jonesi	0	0	0	NA
Benin	Galago senegalensis	1	0	0	A
Benin	Dasymys rufulus	0	0	0	NA
Benin	Tragelaphus scriptus	0	1	0	NA
Benin	Gerbilliscus guineae	0	0	0	NA
Benin	Hipposideros cyclops	0	0	0	NA
Benin	Cercopithecus erythrogaster	1	1	0	AB
Benin	Funisciurus substriatus	0	0	0	NA
Benin	Crocidura lamottei	0	0	0	NA
Benin	Hypsignathus monstrosus	0	0	0	NA
Benin	Cephalophus rufilatus	0	1	0	NA
Benin	Redunca redunca	0	0	0	NA
Benin	Kobus ellipsiprymnus	0	0	0	NA
Benin	Procolobus verus	1	0	0	A
Benin	Heliosciurus gambianus	0	1	0	NA
Benin	Cricetomys emini	0	0	0	NA
Benin	Genetta pardina	0	0	0	NA
Benin	Epomops franqueti	0	1	0	NA
Benin	Caracal caracal	0	0	0	NA
Benin	Glauconycteris poensis	0	0	0	NA
Benin	Mungos gambianus	0	0	0	NA
Benin	Felis silvestris	0	0	0	NA
Benin	Cephalophus silvicultor	0	1	0	NA
Benin	Lavia frons	0	0	0	NA
Benin	Hippotragus equinus	0	0	0	NA
Benin	Graphiurus crassicaudatus	0	0	0	NA
Benin	Hyaena hyaena	0	0	0	NA
Bhutan	Trachypithecus pileatus	1	0	0	A
Bhutan	Mustela kathiah	0	0	0	NA
Bhutan	Hipposideros armiger	0	0	0	NA
Bhutan	Petaurista elegans	0	0	0	NA
Bhutan	Muntiacus gongshanensis	0	0	0	NA
Bhutan	Nycticebus bengalensis	1	0	0	A
Bhutan	Catopuma temminckii	0	0	0	NA
Bhutan	Rusa unicolor	0	0	0	NA
Bhutan	Ursus arctos	1	0	0	A
Bhutan	Tupaia belangeri	0	0	0	NA
Bhutan	Ursus thibetanus	1	0	0	A
Bhutan	Martes foina	0	0	0	NA
Bhutan	Axis porcinus	1	0	0	A
Bhutan	Prionailurus bengalensis	0	0	0	NA
Bhutan	Coelops frithii	0	0	0	NA
Bhutan	Suncus murinus	0	0	0	NA
Bhutan	Rhinolophus affinis	0	0	0	NA
Bhutan	Kerivoula picta	0	0	0	NA
Bhutan	Pardofelis marmorata	0	0	0	NA
Bhutan	Hystrix brachyura	0	0	0	NA
Bhutan	Viverricula indica	0	0	0	NA
Bhutan	Manis pentadactyla	0	0	0	NA
Bhutan	Herpestes urva	1	0	0	A
Bhutan	Melogale personata	0	0	0	NA
Bhutan	Macroglossus sobrinus	0	0	0	NA
Bhutan	Callosciurus erythraeus	0	0	0	NA
Bhutan	Aonyx cinereus	0	0	0	NA
Bhutan	Macaca assamensis	0	0	0	NA
Bhutan	Megaderma spasma	0	0	0	NA
Bhutan	Eonycteris spelaea	0	0	0	NA
Bhutan	Paradoxurus hermaphroditus	0	0	0	NA
Bhutan	Rhinoceros unicornis	1	0	0	A
Bhutan	Panthera pardus	0	0	0	NA
Bhutan	Canis lupus	1	0	0	A
Bhutan	Canis aureus	0	0	0	NA
Bhutan	Pseudois nayaur	0	0	0	NA
Bhutan	Sus scrofa	0	0	0	NA
Bhutan	Cynopterus brachyotis	1	0	0	A
Bhutan	Petaurista petaurista	0	0	0	NA
Bhutan	Ailurus fulgens	1	0	0	A
Bhutan	Semnopithecus schistaceus	1	0	0	A
Bhutan	Mustela altaica	0	0	0	NA
Bhutan	Equus kiang	0	0	0	NA
Bhutan	Arctictis binturong	0	0	0	NA
Bhutan	Hipposideros larvatus	0	0	0	NA
Bhutan	Lynx lynx	0	0	0	NA
Bhutan	Kerivoula hardwickii	0	0	0	NA
Bhutan	Ratufa bicolor	0	0	0	NA
Bhutan	Moschus fuscus	0	0	0	NA
Bhutan	Petaurista nobilis	0	0	0	NA
Bhutan	Capricornis thar	0	0	0	NA
Bhutan	Macaca mulatta	1	0	0	A
Bhutan	Prionailurus viverrinus	0	0	0	NA
Bhutan	Cynopterus sphinx	0	0	0	NA
Bhutan	Rhinolophus macrotis	0	0	0	NA
Bhutan	Melogale moschata	1	0	0	A
Bhutan	Budorcas taxicolor	0	0	0	NA
Bhutan	Ovis ammon	0	0	0	NA
Bhutan	Semnopithecus hector	1	0	0	A
Bhutan	Neofelis nebulosa	0	0	0	NA
Bhutan	Neodon sikimensis	0	0	0	NA
Bhutan	Lutra lutra	0	0	0	NA
Bhutan	Panthera tigris	1	0	0	A
Bhutan	Caprolagus hispidus	0	0	0	NA
Bhutan	Mustela sibirica	1	0	0	A
Bhutan	Rattus andamanensis	0	0	0	NA
Bhutan	Elephas maximus	0	0	0	NA
Bhutan	Moschus chrysogaster	0	0	0	NA
Bhutan	Trachypithecus geei	1	0	0	A
Bhutan	Leopoldamys edwardsi	0	0	0	NA
Bhutan	Naemorhedus goral	0	0	0	NA
Bhutan	Ochotona curzoniae	0	0	0	NA
Bhutan	Martes flavigula	0	0	0	NA
Bhutan	Harpiocephalus harpia	0	0	0	NA
Bhutan	Lutrogale perspicillata	0	0	0	NA
Bhutan	Trogopterus xanthipes	0	0	0	NA
Bhutan	Golunda ellioti	0	0	0	NA
Bhutan	Taphozous longimanus	0	0	0	NA
Bhutan	Viverra zibetha	0	0	0	NA
Bhutan	Petaurista magnificus	0	0	0	NA
Bhutan	Hipposideros lankadiva	0	0	0	NA
Bhutan	Ochotona thibetana	0	0	0	NA
Bhutan	Vulpes vulpes	1	0	0	A
Bhutan	Pteropus giganteus	0	0	0	NA
Bhutan	Phaiomys leucurus	0	0	0	NA
Bhutan	Rhinolophus pearsonii	0	0	0	NA
Bhutan	Hemitragus jemlahicus	0	0	0	NA
Bhutan	Prionodon pardicolor	0	0	0	NA
Bhutan	Megaerops niphanae	0	0	0	NA
Bhutan	Axis axis	1	0	0	A
Bhutan	Melursus ursinus	1	0	0	A
Bhutan	Cuon alpinus	0	0	0	NA
Bhutan	Mustela strigidorsa	0	0	0	NA
Bolivia	Cynomops abrasus	0	0	1	NA
Bolivia	Uroderma bilobatum	0	0	1	NA
Bolivia	Lagothrix cana	1	0	1	NA
Bolivia	Rhogeessa io	0	0	1	NA
Bolivia	Micronycteris megalotis	0	1	1	NA
Bolivia	Panthera onca	1	1	1	ABC
Bolivia	Potos flavus	1	0	1	NA
Bolivia	Ateles chamek	1	0	1	NA
Bolivia	Bassaricyon alleni	0	0	1	NA
Bolivia	Ctenomys boliviensis	0	1	1	NA
Bolivia	Coendou bicolor	0	1	1	NA
Bolivia	Phyllostomus hastatus	0	1	1	NA
Bolivia	Mustela africana	0	0	1	NA
Bolivia	Cormura brevirostris	0	0	1	NA
Bolivia	Trinycteris nicefori	0	0	1	NA
Bolivia	Saccopteryx leptura	0	1	1	NA
Bolivia	Oecomys bicolor	0	0	1	NA
Bolivia	Blastocerus dichotomus	0	0	1	NA
Bolivia	Sphaeronycteris toxophyllum	0	0	1	NA
Bolivia	Bradypus variegatus	0	1	1	NA
Bolivia	Tonatia saurophila	0	1	1	NA
Bolivia	Rhynchonycteris naso	0	0	1	NA
Bolivia	Mazama gouazoubira	0	1	1	NA
Bolivia	Cebus albifrons	1	0	1	NA
Bolivia	Mesomys hispidus	0	0	1	NA
Bolivia	Cyclopes didactylus	0	0	1	NA
Bolivia	Makalata didelphoides	0	0	1	NA
Bolivia	Dinomys branickii	0	0	1	NA
Bolivia	Pithecia irrorata	1	0	1	NA
Bolivia	Artibeus obscurus	0	0	1	NA
Bolivia	Saguinus fuscicollis	1	0	1	NA
Bolivia	Pteronura brasiliensis	0	0	1	NA
Bolivia	Chiropotes albinasus	1	0	0	A
Bolivia	Hippocamelus antisensis	0	0	1	NA
Bolivia	Peropteryx macrotis	0	1	1	NA
Bolivia	Dactylomys dactylinus	0	0	1	NA
Bolivia	Neacomys spinosus	0	1	1	NA
Bolivia	Caluromys philander	0	0	1	NA
Bolivia	Ctenomys steinbachi	0	1	1	NA
Bolivia	Ctenomys dorsalis	0	0	0	NA
Bolivia	Galictis vittata	0	1	1	NA
Bolivia	Cabassous unicinctus	0	1	1	NA
Bolivia	Trachops cirrhosus	0	1	1	NA
Bolivia	Phyllostomus discolor	0	1	1	NA
Bolivia	Pecari tajacu	0	1	1	NA
Bolivia	Sciurus spadiceus	0	0	1	NA
Bolivia	Lonchophylla thomasi	0	1	1	NA
Bolivia	Isothrix bistriata	0	0	1	NA
Bolivia	Mustela frenata	0	0	1	NA
Bolivia	Saguinus labiatus	1	0	1	NA
Bolivia	Vicugna vicugna	0	0	1	NA
Bolivia	Procyon cancrivorus	0	0	1	NA
Bolivia	Caluromys lanatus	0	1	1	NA
Bolivia	Caluromysiops irrupta	0	0	0	NA
Bolivia	Leopardus wiedii	0	0	1	NA
Bolivia	Alouatta caraya	0	0	1	NA
Bolivia	Saimiri ustus	1	0	0	A
Bolivia	Diaemus youngi	0	1	1	NA
Bolivia	Puma concolor	0	0	1	NA
Bolivia	Micronycteris hirsuta	0	0	1	NA
Bolivia	Lagostomus maximus	0	0	1	NA
Bolivia	Tayassu pecari	1	0	1	NA
Bolivia	Artibeus lituratus	0	1	1	NA
Bolivia	Lophostoma brasiliense	0	1	1	NA
Bolivia	Aotus azarae	0	0	1	NA
Bolivia	Artibeus concolor	0	0	1	NA
Bolivia	Coendou prehensilis	0	0	1	NA
Bolivia	Marmosops noctivagus	0	0	1	NA
Bolivia	Mesophylla macconnelli	0	0	1	NA
Bolivia	Glyphonycteris daviesi	0	0	1	NA
Bolivia	Chiroderma trinitatum	0	0	1	NA
Bolivia	Myrmecophaga tridactyla	0	1	1	NA
Bolivia	Eira barbara	0	0	1	NA
Bolivia	Microsciurus flaviventer	0	0	1	NA
Bolivia	Thyroptera discifera	0	0	1	NA
Bolivia	Ctenomys conoveri	0	0	1	NA
Bolivia	Ctenomys goodfellowi	0	0	1	NA
Bolivia	Speothos venaticus	0	1	1	NA
Bolivia	Proechimys steerei	0	0	1	NA
Bolivia	Tamandua tetradactyla	0	0	1	NA
Bolivia	Choloepus hoffmanni	0	0	1	NA
Bolivia	Lophostoma carrikeri	0	0	1	NA
Bolivia	Marmosa lepida	0	0	1	NA
Bolivia	Mazama chunyi	0	0	1	NA
Bolivia	Saguinus imperator	1	0	1	NA
Bolivia	Alouatta sara	0	0	1	NA
Bolivia	Oecomys roberti	0	0	1	NA
Bolivia	Glironia venusta	0	0	1	NA
Bolivia	Saimiri boliviensis	1	0	1	NA
Bolivia	Oecomys superans	0	0	1	NA
Bolivia	Lionycteris spurrelli	0	0	1	NA
Bolivia	Mazama americana	0	0	1	NA
Bolivia	Choeroniscus minor	0	1	1	NA
Bolivia	Chrysocyon brachyurus	0	0	1	NA
Bolivia	Monodelphis emiliae	0	0	1	NA
Bolivia	Centronycteris centralis	0	0	1	NA
Bolivia	Eptesicus chiriquinus	0	0	1	NA
Bolivia	Cuniculus paca	0	0	1	NA
Bolivia	Uroderma magnirostrum	0	0	1	NA
Bolivia	Dasypus kappleri	0	0	1	NA
Bolivia	Aotus nigriceps	1	0	1	NA
Bolivia	Odocoileus virginianus	1	0	1	NA
Bolivia	Dasyprocta fuliginosa	0	0	0	NA
Bolivia	Vampyrodes caraccioli	0	1	1	NA
Bolivia	Tremarctos ornatus	0	0	1	NA
Bolivia	Phylloderma stenops	0	0	1	NA
Bolivia	Tapirus terrestris	0	0	1	NA
Bolivia	Cyttarops alecto	0	0	0	NA
Bolivia	Leopardus tigrinus	0	0	1	NA
Bolivia	Ozotoceros bezoarticus	0	0	1	NA
Bolivia	Callimico goeldii	0	0	1	NA
Bolivia	Carollia brevicauda	0	0	1	NA
Bolivia	Oligoryzomys microtis	0	1	1	NA
Bolivia	Phyllostomus elongatus	0	0	1	NA
Bolivia	Rhinophylla pumilio	0	0	1	NA
Bosnia and Herzegovina	Apodemus flavicollis	0	0	1	NA
Bosnia and Herzegovina	Mustela nivalis	0	1	1	NA
Bosnia and Herzegovina	Mustela erminea	1	0	0	A
Bosnia and Herzegovina	Ursus arctos	1	1	1	ABC
Bosnia and Herzegovina	Martes foina	0	1	1	NA
Bosnia and Herzegovina	Lepus europaeus	0	1	1	NA
Bosnia and Herzegovina	Arvicola amphibius	0	1	1	NA
Bosnia and Herzegovina	Capreolus capreolus	0	1	1	NA
Bosnia and Herzegovina	Dama dama	0	0	0	NA
Bosnia and Herzegovina	Rupicapra rupicapra	0	1	1	NA
Bosnia and Herzegovina	Canis lupus	1	1	1	ABC
Bosnia and Herzegovina	Canis aureus	0	1	1	NA
Bosnia and Herzegovina	Sus scrofa	0	1	1	NA
Bosnia and Herzegovina	Ondatra zibethicus	0	0	0	NA
Bosnia and Herzegovina	Lynx lynx	0	0	1	NA
Bosnia and Herzegovina	Mustela putorius	1	1	1	ABC
Bosnia and Herzegovina	Microtus subterraneus	0	1	1	NA
Bosnia and Herzegovina	Microtus arvalis	0	1	1	NA
Bosnia and Herzegovina	Castor fiber	0	1	1	NA
Bosnia and Herzegovina	Cervus elaphus	0	0	0	NA
Bosnia and Herzegovina	Apodemus sylvaticus	0	1	1	NA
Bosnia and Herzegovina	Sorex alpinus	0	1	1	NA
Bosnia and Herzegovina	Lutra lutra	0	0	1	NA
Bosnia and Herzegovina	Martes martes	0	1	1	NA
Bosnia and Herzegovina	Micromys minutus	0	1	1	NA
Bosnia and Herzegovina	Vulpes vulpes	1	1	1	ABC
Bosnia and Herzegovina	Microtus agrestis	0	0	0	NA
Bosnia and Herzegovina	Felis silvestris	0	0	0	NA
Botswana	Panthera leo	0	0	0	NA
Botswana	Giraffa camelopardalis	1	0	0	A
Botswana	Oryx gazella	0	0	0	NA
Botswana	Tragelaphus strepsiceros	0	1	0	NA
Botswana	Connochaetes taurinus	0	0	0	NA
Botswana	Tragelaphus angasii	0	0	0	NA
Botswana	Raphicerus campestris	0	0	0	NA
Botswana	Herpestes ichneumon	0	0	0	NA
Botswana	Otolemur crassicaudatus	0	0	0	NA
Botswana	Chlorocebus pygerythrus	0	1	0	NA
Botswana	Syncerus caffer	0	0	0	NA
Botswana	Hippotragus niger	0	0	0	NA
Botswana	Panthera pardus	0	0	0	NA
Botswana	Ceratotherium simum	0	0	0	NA
Botswana	Diceros bicornis	0	0	0	NA
Botswana	Chlorocebus cynosuros	0	0	0	NA
Botswana	Raphicerus sharpei	0	0	0	NA
Botswana	Aepyceros melampus	0	0	0	NA
Botswana	Papio ursinus	0	0	0	NA
Botswana	Ourebia ourebi	0	0	0	NA
Botswana	Alcelaphus buselaphus	1	1	0	AB
Botswana	Tragelaphus spekii	0	0	0	NA
Botswana	Mellivora capensis	0	0	0	NA
Botswana	Damaliscus lunatus	0	0	0	NA
Botswana	Redunca arundinum	0	0	0	NA
Botswana	Kobus leche	0	0	0	NA
Botswana	Crocuta crocuta	1	0	0	A
Botswana	Atilax paludinosus	0	0	0	NA
Botswana	Thallomys paedulcus	0	0	0	NA
Botswana	Potamochoerus larvatus	0	1	0	NA
Botswana	Galago moholi	0	0	0	NA
Botswana	Antidorcas marsupialis	0	0	0	NA
Botswana	Tragelaphus scriptus	0	0	0	NA
Botswana	Otocyon megalotis	0	0	0	NA
Botswana	Kobus ellipsiprymnus	0	0	0	NA
Botswana	Caracal caracal	0	0	0	NA
Botswana	Felis silvestris	0	0	0	NA
Botswana	Hippotragus equinus	0	0	0	NA
Brazil	Cynomops abrasus	0	0	1	NA
Brazil	Mazama nana	0	0	1	NA
Brazil	Phyllostomus latifolius	0	0	1	NA
Brazil	Mesomys stimulax	0	0	1	NA
Brazil	Uroderma bilobatum	0	0	1	NA
Brazil	Lagothrix cana	1	0	1	NA
Brazil	Carollia castanea	0	0	0	NA
Brazil	Rhogeessa io	0	1	1	NA
Brazil	Alouatta belzebul	1	0	1	NA
Brazil	Micronycteris megalotis	0	1	1	NA
Brazil	Thyroptera lavali	0	0	0	NA
Brazil	Marmosa rubra	0	0	0	NA
Brazil	Panthera onca	1	1	1	ABC
Brazil	Callicebus nigrifrons	0	0	1	NA
Brazil	Potos flavus	1	0	1	NA
Brazil	Callithrix jacchus	1	0	1	NA
Brazil	Callithrix flaviceps	0	0	1	NA
Brazil	Ateles chamek	1	0	1	NA
Brazil	Echimys chrysurus	0	0	1	NA
Brazil	Bassaricyon alleni	0	0	1	NA
Brazil	Ctenomys boliviensis	0	1	1	NA
Brazil	Alouatta nigerrima	1	0	1	NA
Brazil	Coendou bicolor	0	0	0	NA
Brazil	Phyllostomus hastatus	0	1	1	NA
Brazil	Mustela africana	0	0	1	NA
Brazil	Cormura brevirostris	0	0	1	NA
Brazil	Ctenomys minutus	0	1	1	NA
Brazil	Diclidurus scutatus	0	1	1	NA
Brazil	Cebus kaapori	1	0	1	NA
Brazil	Trinycteris nicefori	0	1	1	NA
Brazil	Galea flavidens	0	0	1	NA
Brazil	Callithrix kuhlii	0	1	1	NA
Brazil	Saccopteryx leptura	0	1	1	NA
Brazil	Lepus europaeus	0	1	1	NA
Brazil	Oecomys bicolor	0	0	1	NA
Brazil	Alouatta guariba	0	0	1	NA
Brazil	Callithrix aurita	0	0	1	NA
Brazil	Blastocerus dichotomus	0	0	1	NA
Brazil	Sphaeronycteris toxophyllum	0	0	1	NA
Brazil	Ateles paniscus	1	0	1	NA
Brazil	Bradypus variegatus	0	1	1	NA
Brazil	Tonatia saurophila	0	1	1	NA
Brazil	Rhynchonycteris naso	0	0	1	NA
Brazil	Zygodontomys brevicauda	0	0	1	NA
Brazil	Mazama gouazoubira	0	1	1	NA
Brazil	Lophostoma schulzi	0	0	1	NA
Brazil	Isothrix pagurus	0	0	1	NA
Brazil	Cebus albifrons	1	0	1	NA
Brazil	Mesomys hispidus	0	1	1	NA
Brazil	Cyclopes didactylus	0	0	1	NA
Brazil	Ateles marginatus	1	0	1	NA
Brazil	Makalata didelphoides	0	1	1	NA
Brazil	Aotus nancymaae	1	0	1	NA
Brazil	Phyllomys lamarum	0	0	1	NA
Brazil	Dinomys branickii	0	0	1	NA
Brazil	Callicebus barbarabrownae	1	0	1	NA
Brazil	Pithecia irrorata	1	0	1	NA
Brazil	Artibeus obscurus	0	0	1	NA
Brazil	Neacomys guianae	0	0	0	NA
Brazil	Saguinus fuscicollis	1	0	1	NA
Brazil	Callistomys pictus	0	1	1	NA
Brazil	Pteronura brasiliensis	0	0	1	NA
Brazil	Cavia fulgida	0	0	1	NA
Brazil	Cacajao melanocephalus	1	0	1	NA
Brazil	Aotus trivirgatus	1	0	1	NA
Brazil	Pithecia albicans	1	0	1	NA
Brazil	Leontopithecus chrysopygus	0	0	1	NA
Brazil	Mazama bororo	0	0	1	NA
Brazil	Chiropotes albinasus	1	0	1	NA
Brazil	Proechimys goeldii	0	1	1	NA
Brazil	Bradypus tridactylus	0	0	1	NA
Brazil	Callicebus coimbrai	1	0	1	NA
Brazil	Coendou nycthemera	0	0	1	NA
Brazil	Peropteryx macrotis	0	1	1	NA
Brazil	Brachyteles arachnoides	1	0	1	NA
Brazil	Leontopithecus chrysomelas	1	1	1	ABC
Brazil	Leontopithecus caissara	0	0	0	NA
Brazil	Sciurus gilvigularis	0	0	1	NA
Brazil	Scleronycteris ega	0	1	1	NA
Brazil	Dactylomys dactylinus	0	0	1	NA
Brazil	Neacomys spinosus	0	1	1	NA
Brazil	Caluromys philander	0	1	1	NA
Brazil	Lampronycteris brachyotis	0	1	1	NA
Brazil	Galictis vittata	0	1	1	NA
Brazil	Callithrix geoffroyi	0	0	1	NA
Brazil	Cabassous unicinctus	0	1	1	NA
Brazil	Glossophaga longirostris	0	0	1	NA
Brazil	Dasyprocta prymnolopha	0	0	1	NA
Brazil	Trachops cirrhosus	0	1	1	NA
Brazil	Oecomys rutilus	0	1	1	NA
Brazil	Sylvilagus brasiliensis	0	0	1	NA
Brazil	Diclidurus ingens	0	1	1	NA
Brazil	Saguinus melanoleucus	0	0	1	NA
Brazil	Saguinus martinsi	0	0	1	NA
Brazil	Phyllostomus discolor	0	1	1	NA
Brazil	Pecari tajacu	0	1	1	NA
Brazil	Sciurillus pusillus	0	0	1	NA
Brazil	Sciurus spadiceus	0	0	1	NA
Brazil	Saimiri vanzolinii	1	0	1	NA
Brazil	Leontopithecus rosalia	0	0	0	NA
Brazil	Brachyteles hypoxanthus	0	0	1	NA
Brazil	Lonchophylla thomasi	0	1	1	NA
Brazil	Nectomys rattus	0	1	1	NA
Brazil	Ametrida centurio	0	0	1	NA
Brazil	Isothrix bistriata	0	0	1	NA
Brazil	Pithecia monachus	1	0	1	NA
Brazil	Mustela frenata	0	0	1	NA
Brazil	Calomys hummelincki	0	0	1	NA
Brazil	Anoura latidens	0	0	1	NA
Brazil	Saguinus labiatus	1	0	1	NA
Brazil	Saimiri sciureus	1	0	1	NA
Brazil	Lagothrix lagothricha	1	0	1	NA
Brazil	Saguinus niger	1	0	1	NA
Brazil	Necromys urichi	0	0	1	NA
Brazil	Procyon cancrivorus	0	0	1	NA
Brazil	Caluromys lanatus	0	1	1	NA
Brazil	Cacajao calvus	1	0	1	NA
Brazil	Chaetomys subspinosus	0	1	1	NA
Brazil	Caluromysiops irrupta	0	0	1	NA
Brazil	Leopardus wiedii	0	0	1	NA
Brazil	Alouatta caraya	0	0	1	NA
Brazil	Neonycteris pusilla	0	0	1	NA
Brazil	Saimiri ustus	1	0	1	NA
Brazil	Diaemus youngi	0	1	1	NA
Brazil	Puma concolor	0	0	1	NA
Brazil	Centronycteris maximiliani	0	0	1	NA
Brazil	Tolypeutes tricinctus	0	0	1	NA
Brazil	Saccopteryx canescens	0	1	1	NA
Brazil	Micronycteris hirsuta	0	1	1	NA
Brazil	Lonchorhina inusitata	0	0	1	NA
Brazil	Tayassu pecari	1	0	1	NA
Brazil	Artibeus lituratus	0	1	1	NA
Brazil	Lophostoma brasiliense	0	1	1	NA
Brazil	Kerodon rupestris	1	0	1	NA
Brazil	Aotus azarae	0	0	1	NA
Brazil	Artibeus concolor	0	0	1	NA
Brazil	Lagothrix poeppigii	1	0	1	NA
Brazil	Coendou prehensilis	0	0	1	NA
Brazil	Bradypus torquatus	0	1	1	NA
Brazil	Saguinus mystax	1	0	1	NA
Brazil	Marmosops noctivagus	0	0	1	NA
Brazil	Mesophylla macconnelli	0	0	1	NA
Brazil	Saguinus inustus	0	0	1	NA
Brazil	Proechimys guyannensis	0	1	1	NA
Brazil	Sigmodon alstoni	0	0	1	NA
Brazil	Rhipidomys nitela	0	1	1	NA
Brazil	Proechimys cuvieri	0	1	1	NA
Brazil	Rhinophylla fischerae	0	0	1	NA
Brazil	Glyphonycteris daviesi	0	0	1	NA
Brazil	Chiroderma trinitatum	0	0	1	NA
Brazil	Myrmecophaga tridactyla	0	1	1	NA
Brazil	Eira barbara	0	0	1	NA
Brazil	Microsciurus flaviventer	0	0	1	NA
Brazil	Lonchothrix emiliae	0	0	1	NA
Brazil	Thyroptera discifera	0	1	1	NA
Brazil	Saccopteryx gymnura	0	0	1	NA
Brazil	Speothos venaticus	0	1	1	NA
Brazil	Proechimys steerei	0	0	1	NA
Brazil	Tamandua tetradactyla	0	0	1	NA
Brazil	Choloepus hoffmanni	0	0	1	NA
Brazil	Proechimys quadruplicatus	0	0	1	NA
Brazil	Platyrrhinus aurarius	0	0	1	NA
Brazil	Lophostoma carrikeri	0	0	1	NA
Brazil	Pithecia pithecia	1	0	1	NA
Brazil	Callithrix penicillata	0	0	1	NA
Brazil	Marmosa lepida	0	0	1	NA
Brazil	Saguinus imperator	1	0	1	NA
Brazil	Alouatta sara	0	0	0	NA
Brazil	Oecomys roberti	0	1	1	NA
Brazil	Glironia venusta	0	0	1	NA
Brazil	Callicebus personatus	0	0	1	NA
Brazil	Saimiri boliviensis	1	0	1	NA
Brazil	Oecomys superans	0	1	1	NA
Brazil	Galea spixii	0	0	1	NA
Brazil	Sciurus igniventris	0	0	1	NA
Brazil	Lionycteris spurrelli	0	1	1	NA
Brazil	Conepatus semistriatus	0	0	1	NA
Brazil	Ateles belzebuth	1	0	1	NA
Brazil	Mazama americana	0	0	1	NA
Brazil	Saguinus midas	1	0	1	NA
Brazil	Myoprocta acouchy	0	0	1	NA
Brazil	Choloepus didactylus	0	0	1	NA
Brazil	Lasiurus castaneus	0	0	0	NA
Brazil	Choeroniscus minor	0	1	1	NA
Brazil	Chrysocyon brachyurus	0	1	1	NA
Brazil	Oxymycterus angularis	0	0	1	NA
Brazil	Monodelphis emiliae	0	0	1	NA
Brazil	Centronycteris centralis	0	0	1	NA
Brazil	Eptesicus chiriquinus	0	0	0	NA
Brazil	Cuniculus paca	0	0	1	NA
Brazil	Uroderma magnirostrum	0	0	1	NA
Brazil	Callicebus melanochir	0	0	1	NA
Brazil	Dasypus kappleri	0	0	1	NA
Brazil	Aotus nigriceps	1	0	1	NA
Brazil	Choeroniscus godmani	0	0	1	NA
Brazil	Odocoileus virginianus	1	1	1	ABC
Brazil	Dasyprocta fuliginosa	0	0	1	NA
Brazil	Vampyrodes caraccioli	0	1	1	NA
Brazil	Aotus vociferans	1	0	1	NA
Brazil	Alouatta macconnelli	1	0	1	NA
Brazil	Phylloderma stenops	0	0	1	NA
Brazil	Oecomys rex	0	1	1	NA
Brazil	Tapirus terrestris	0	0	1	NA
Brazil	Cyttarops alecto	0	1	1	NA
Brazil	Leopardus tigrinus	0	0	1	NA
Brazil	Dasyprocta leporina	1	1	1	ABC
Brazil	Ozotoceros bezoarticus	0	1	1	NA
Brazil	Callimico goeldii	0	0	1	NA
Brazil	Carollia brevicauda	0	0	1	NA
Brazil	Molossus pretiosus	0	1	1	NA
Brazil	Oligoryzomys microtis	0	1	1	NA
Brazil	Saguinus bicolor	1	0	1	NA
Brazil	Phyllostomus elongatus	0	0	1	NA
Brazil	Rhinophylla pumilio	0	0	1	NA
Brunei	Presbytis rubicunda	1	0	0	A
Brunei	Tupaia tana	0	0	0	NA
Brunei	Kerivoula whiteheadi	0	0	0	NA
Brunei	Chaerephon plicatus	0	0	0	NA
Brunei	Petaurista elegans	0	0	0	NA
Brunei	Aeromys tephromelas	1	0	0	A
Brunei	Kerivoula pellucida	0	0	0	NA
Brunei	Philetor brachypterus	0	0	0	NA
Brunei	Glischropus tylopus	0	0	0	NA
Brunei	Tupaia gracilis	0	0	0	NA
Brunei	Cheiromeles torquatus	1	0	0	A
Brunei	Rhinolophus borneensis	0	0	0	NA
Brunei	Rusa unicolor	0	0	0	NA
Brunei	Viverra tangalunga	1	0	0	A
Brunei	Manis javanica	1	0	0	A
Brunei	Rhinosciurus laticaudatus	1	0	0	A
Brunei	Saccolaimus saccolaimus	1	0	0	A
Brunei	Hemigalus derbyanus	1	0	0	A
Brunei	Maxomys ochraceiventer	0	0	0	NA
Brunei	Hylobates muelleri	1	0	0	A
Brunei	Maxomys rajah	0	0	0	NA
Brunei	Aeromys thomasi	1	0	0	A
Brunei	Emballonura alecto	1	0	0	A
Brunei	Callosciurus adamsi	0	0	0	NA
Brunei	Ptilocercus lowii	0	0	0	NA
Brunei	Niviventer rapit	0	0	0	NA
Brunei	Rheithrosciurus macrotis	1	0	0	A
Brunei	Hipposideros diadema	0	0	0	NA
Brunei	Murina suilla	0	0	0	NA
Brunei	Prionailurus bengalensis	0	0	0	NA
Brunei	Emballonura monticola	0	0	0	NA
Brunei	Tupaia minor	0	0	0	NA
Brunei	Suncus murinus	0	0	0	NA
Brunei	Tragulus kanchil	1	0	0	A
Brunei	Hystrix brachyura	0	0	0	NA
Brunei	Leopoldamys sabanus	0	0	0	NA
Brunei	Macroglossus minimus	1	0	0	A
Brunei	Haeromys pusillus	0	0	0	NA
Brunei	Petinomys setosus	0	0	0	NA
Brunei	Aonyx cinereus	0	0	0	NA
Brunei	Rousettus amplexicaudatus	1	0	0	A
Brunei	Miniopterus magnater	0	0	0	NA
Brunei	Rattus exulans	0	0	0	NA
Brunei	Sundamys muelleri	0	0	0	NA
Brunei	Lariscus insignis	0	0	0	NA
Brunei	Helarctos malayanus	1	0	0	A
Brunei	Dyacopterus spadiceus	0	0	0	NA
Brunei	Callosciurus prevostii	0	0	0	NA
Brunei	Megaderma spasma	0	0	0	NA
Brunei	Eonycteris spelaea	0	0	0	NA
Brunei	Macaca nemestrina	1	0	0	A
Brunei	Hipposideros cervinus	0	0	0	NA
Brunei	Miniopterus medius	0	0	0	NA
Brunei	Sus barbatus	1	0	0	A
Brunei	Paradoxurus hermaphroditus	0	0	0	NA
Brunei	Tupaia longipes	0	0	0	NA
Brunei	Tragulus napu	1	0	0	A
Brunei	Hylomys suillus	0	0	0	NA
Brunei	Kerivoula intermedia	0	0	0	NA
Brunei	Lenothrix canus	0	0	0	NA
Brunei	Exilisciurus exilis	0	0	0	NA
Brunei	Mydaus javanensis	0	0	0	NA
Brunei	Muntiacus atherodes	1	0	0	A
Brunei	Cynopterus brachyotis	1	0	0	A
Brunei	Penthetor lucasi	1	0	0	A
Brunei	Petaurista petaurista	0	0	0	NA
Brunei	Catopuma badia	0	0	0	NA
Brunei	Sundasciurus hippurus	0	0	0	NA
Brunei	Hylopetes spadiceus	1	0	0	A
Brunei	Petinomys vordermanni	0	0	0	NA
Brunei	Mops mops	0	0	0	NA
Brunei	Callosciurus notatus	0	0	0	NA
Brunei	Arctictis binturong	0	0	0	NA
Brunei	Macaca fascicularis	1	0	0	A
Brunei	Muntiacus muntjak	1	0	0	A
Brunei	Niviventer cremoriventer	0	0	0	NA
Brunei	Kerivoula hardwickii	0	0	0	NA
Brunei	Herpestes semitorquatus	1	0	0	A
Brunei	Sundasciurus lowii	0	0	0	NA
Brunei	Trachypithecus cristatus	1	0	0	A
Brunei	Dremomys everetti	0	0	0	NA
Brunei	Ratufa affinis	1	0	0	A
Brunei	Herpestes brachyurus	1	0	0	A
Brunei	Aethalops aequalis	0	0	0	NA
Brunei	Hylopetes platyurus	0	0	0	NA
Brunei	Rattus tiomanicus	0	0	0	NA
Brunei	Nannosciurus melanotis	0	0	0	NA
Brunei	Rhinolophus trifoliatus	0	0	0	NA
Brunei	Taphozous melanopogon	0	0	0	NA
Brunei	Myotis hasseltii	0	0	0	NA
Brunei	Sundamys infraluteus	1	0	0	A
Brunei	Tarsius bancanus	1	0	0	A
Brunei	Sundasciurus tenuis	0	0	0	NA
Brunei	Chiropodomys pusillus	0	0	0	NA
Brunei	Crocidura monticola	0	0	0	NA
Brunei	Rhinolophus sedulus	0	0	0	NA
Brunei	Myotis gomantongensis	0	0	0	NA
Brunei	Nasalis larvatus	1	0	0	A
Brunei	Cynopterus horsfieldii	1	0	0	A
Brunei	Nycteris tragata	0	0	0	NA
Brunei	Tupaia montana	0	0	0	NA
Brunei	Cynogale bennettii	1	0	0	A
Brunei	Echinosorex gymnura	0	0	0	NA
Brunei	Arctogalidia trivirgata	0	0	0	NA
Brunei	Hipposideros ridleyi	0	0	0	NA
Brunei	Hystrix crassispinis	1	0	0	A
Brunei	Chironax melanocephalus	0	0	0	NA
Brunei	Rhinolophus philippinensis	0	0	0	NA
Brunei	Prionodon linsang	1	0	0	A
Brunei	Kerivoula papillosa	0	0	0	NA
Brunei	Myotis horsfieldii	0	0	0	NA
Brunei	Chiropodomys muroides	0	0	0	NA
Brunei	Maxomys surifer	0	0	0	NA
Brunei	Maxomys baeodon	0	0	0	NA
Brunei	Maxomys whiteheadi	0	0	0	NA
Brunei	Pteromyscus pulverulentus	1	0	0	A
Brunei	Trichys fasciculata	1	0	0	A
Brunei	Balionycteris maculata	0	0	0	NA
Brunei	Hipposideros galeritus	0	0	0	NA
Brunei	Rousettus spinalatus	0	0	0	NA
Brunei	Hipposideros bicolor	0	0	0	NA
Brunei	Rhinolophus creaghi	0	0	0	NA
Brunei	Cynopterus minutus	1	0	0	A
Brunei	Martes flavigula	0	0	0	NA
Brunei	Lutrogale perspicillata	0	0	0	NA
Brunei	Taphozous longimanus	0	0	0	NA
Brunei	Pteropus vampyrus	1	0	0	A
Brunei	Presbytis hosei	1	0	0	A
Brunei	Megaerops wetmorei	0	0	0	NA
Brunei	Megaerops ecaudatus	0	0	0	NA
Brunei	Lutra sumatrana	1	0	0	A
Brunei	Presbytis chrysomelas	1	0	0	A
Brunei	Glyphotes simus	0	0	0	NA
Brunei	Rattus argentiventer	1	0	0	A
Brunei	Callosciurus orestes	0	0	0	NA
Brunei	Chiropodomys major	0	0	0	NA
Brunei	Callosciurus baluensis	0	0	0	NA
Brunei	Hypsugo vordermanni	0	0	0	NA
Brunei	Petinomys genibarbis	0	0	0	NA
Brunei	Petaurillus hosei	0	0	0	NA
Brunei	Mustela nudipes	1	0	0	A
Brunei	Hipposideros coxi	0	0	0	NA
Brunei	Suncus hosei	0	0	0	NA
Brunei	Iomys horsfieldii	1	0	0	A
Brunei	Tupaia dorsalis	0	0	0	NA
Brunei	Prionailurus planiceps	0	0	0	NA
Brunei	Kerivoula minuta	0	0	0	NA
Brunei	Tupaia picta	0	0	0	NA
Brunei	Myotis ridleyi	0	0	0	NA
Brunei	Eonycteris major	0	0	0	NA
Brunei	Diplogale hosei	1	0	0	A
Bulgaria	Apodemus flavicollis	0	0	1	NA
Bulgaria	Mustela nivalis	0	1	1	NA
Bulgaria	Cricetus cricetus	0	1	1	NA
Bulgaria	Ursus arctos	1	1	1	ABC
Bulgaria	Martes foina	0	1	1	NA
Bulgaria	Lepus europaeus	0	1	1	NA
Bulgaria	Arvicola amphibius	0	1	1	NA
Bulgaria	Capreolus capreolus	0	1	1	NA
Bulgaria	Dama dama	0	1	1	NA
Bulgaria	Rupicapra rupicapra	0	0	0	NA
Bulgaria	Canis lupus	1	1	1	ABC
Bulgaria	Canis aureus	0	1	1	NA
Bulgaria	Mustela eversmanii	0	1	1	NA
Bulgaria	Sus scrofa	0	1	1	NA
Bulgaria	Ondatra zibethicus	0	0	1	NA
Bulgaria	Lynx lynx	0	0	0	NA
Bulgaria	Mustela putorius	1	1	1	ABC
Bulgaria	Microtus subterraneus	0	1	1	NA
Bulgaria	Microtus arvalis	0	1	1	NA
Bulgaria	Cervus elaphus	0	1	1	NA
Bulgaria	Apodemus sylvaticus	0	1	1	NA
Bulgaria	Nyctereutes procyonoides	1	1	1	ABC
Bulgaria	Lutra lutra	0	0	1	NA
Bulgaria	Capra ibex	0	0	0	NA
Bulgaria	Microtus guentheri	0	0	0	NA
Bulgaria	Martes martes	0	1	1	NA
Bulgaria	Micromys minutus	0	1	1	NA
Bulgaria	Vulpes vulpes	1	1	1	ABC
Bulgaria	Felis silvestris	0	0	1	NA
Burkina Faso	Epomophorus gambianus	0	0	0	NA
Burkina Faso	Hystrix cristata	0	1	0	NA
Burkina Faso	Panthera leo	0	0	0	NA
Burkina Faso	Epomops buettikoferi	0	0	0	NA
Burkina Faso	Lissonycteris angolensis	0	1	0	NA
Burkina Faso	Micropteropus pusillus	0	1	0	NA
Burkina Faso	Herpestes ichneumon	0	0	0	NA
Burkina Faso	Syncerus caffer	0	0	0	NA
Burkina Faso	Erythrocebus patas	1	1	0	AB
Burkina Faso	Panthera pardus	0	0	0	NA
Burkina Faso	Ceratotherium simum	0	0	0	NA
Burkina Faso	Taterillus petteri	0	1	0	NA
Burkina Faso	Colobus vellerosus	1	0	0	A
Burkina Faso	Vulpes pallida	0	1	0	NA
Burkina Faso	Taphozous nudiventris	0	0	0	NA
Burkina Faso	Myopterus daubentonii	0	0	0	NA
Burkina Faso	Genetta thierryi	0	0	0	NA
Burkina Faso	Arvicanthis niloticus	0	1	0	NA
Burkina Faso	Nycteris gambiensis	0	1	0	NA
Burkina Faso	Steatomys cuppedius	0	0	0	NA
Burkina Faso	Ourebia ourebi	0	0	0	NA
Burkina Faso	Steatomys caurinus	0	0	0	NA
Burkina Faso	Lemniscomys bellieri	0	0	0	NA
Burkina Faso	Alcelaphus buselaphus	1	1	0	AB
Burkina Faso	Funisciurus pyrropus	0	1	0	NA
Burkina Faso	Ictonyx libycus	0	1	0	NA
Burkina Faso	Eudorcas rufifrons	0	1	0	NA
Burkina Faso	Chlorocebus tantalus	1	1	0	AB
Burkina Faso	Gazella dorcas	1	0	0	A
Burkina Faso	Mellivora capensis	0	0	0	NA
Burkina Faso	Damaliscus lunatus	0	0	0	NA
Burkina Faso	Lemniscomys linulus	0	1	0	NA
Burkina Faso	Crocuta crocuta	1	0	0	A
Burkina Faso	Atilax paludinosus	0	0	0	NA
Burkina Faso	Papio anubis	1	1	0	AB
Burkina Faso	Jaculus jaculus	0	0	0	NA
Burkina Faso	Kobus kob	0	0	0	NA
Burkina Faso	Xerus erythropus	0	1	0	NA
Burkina Faso	Hipposideros jonesi	0	0	0	NA
Burkina Faso	Galago senegalensis	1	0	0	A
Burkina Faso	Dasymys rufulus	0	0	0	NA
Burkina Faso	Tragelaphus scriptus	0	1	0	NA
Burkina Faso	Gerbilliscus guineae	0	1	0	NA
Burkina Faso	Funisciurus substriatus	0	0	0	NA
Burkina Faso	Gerbillus nancillus	0	1	0	NA
Burkina Faso	Crocidura lamottei	0	0	0	NA
Burkina Faso	Mus mattheyi	0	1	0	NA
Burkina Faso	Hypsignathus monstrosus	0	0	0	NA
Burkina Faso	Cephalophus rufilatus	0	1	0	NA
Burkina Faso	Redunca redunca	0	0	0	NA
Burkina Faso	Kobus ellipsiprymnus	0	0	0	NA
Burkina Faso	Chlorocebus sabaeus	1	1	0	AB
Burkina Faso	Heliosciurus gambianus	0	1	0	NA
Burkina Faso	Genetta pardina	0	1	0	NA
Burkina Faso	Caracal caracal	0	0	0	NA
Burkina Faso	Mungos gambianus	0	0	0	NA
Burkina Faso	Philantomba maxwellii	0	1	0	NA
Burkina Faso	Felis silvestris	0	0	0	NA
Burkina Faso	Cephalophus silvicultor	0	1	0	NA
Burkina Faso	Lavia frons	0	0	0	NA
Burkina Faso	Hippotragus equinus	0	0	0	NA
Burkina Faso	Hyaena hyaena	0	0	0	NA
Burundi	Sylvisorex johnstoni	0	0	0	NA
Burundi	Hystrix cristata	0	1	0	NA
Burundi	Graphiurus lorraineus	0	0	0	NA
Burundi	Panthera leo	0	0	0	NA
Burundi	Genetta servalina	0	0	0	NA
Burundi	Lissonycteris angolensis	0	1	0	NA
Burundi	Micropteropus pusillus	0	1	0	NA
Burundi	Deomys ferrugineus	0	0	0	NA
Burundi	Herpestes ichneumon	0	0	0	NA
Burundi	Suncus murinus	0	0	0	NA
Burundi	Cercopithecus mitis	1	1	0	AB
Burundi	Otolemur crassicaudatus	0	1	0	NA
Burundi	Chlorocebus pygerythrus	0	1	0	NA
Burundi	Syncerus caffer	0	0	0	NA
Burundi	Genetta victoriae	0	0	0	NA
Burundi	Hippotragus niger	0	0	0	NA
Burundi	Panthera pardus	0	0	0	NA
Burundi	Lophocebus albigena	1	0	0	A
Burundi	Ceratotherium simum	0	0	0	NA
Burundi	Diceros bicornis	0	0	0	NA
Burundi	Funisciurus carruthersi	0	0	0	NA
Burundi	Potamochoerus porcus	0	0	0	NA
Burundi	Galago matschiei	0	0	0	NA
Burundi	Heliosciurus ruwenzorii	0	1	0	NA
Burundi	Arvicanthis niloticus	0	1	0	NA
Burundi	Pelomys hopkinsi	0	0	0	NA
Burundi	Ourebia ourebi	0	0	0	NA
Burundi	Potamogale velox	0	0	0	NA
Burundi	Mylomys dybowskii	0	0	0	NA
Burundi	Scutisorex somereni	0	0	0	NA
Burundi	Pan troglodytes	1	0	0	A
Burundi	Tragelaphus spekii	0	0	0	NA
Burundi	Cercopithecus ascanius	1	0	0	A
Burundi	Nandinia binotata	0	1	0	NA
Burundi	Mellivora capensis	0	0	0	NA
Burundi	Heliosciurus rufobrachium	0	0	0	NA
Burundi	Cephalophus nigrifrons	0	0	0	NA
Burundi	Crocuta crocuta	1	0	0	A
Burundi	Atilax paludinosus	0	0	0	NA
Burundi	Anomalurus pusillus	0	0	0	NA
Burundi	Potamochoerus larvatus	0	1	0	NA
Burundi	Papio anubis	1	1	0	AB
Burundi	Bdeogale crassicauda	0	0	0	NA
Burundi	Colobus angolensis	0	0	0	NA
Burundi	Dendrohyrax arboreus	0	0	0	NA
Burundi	Galago senegalensis	1	0	0	A
Burundi	Tragelaphus scriptus	0	1	0	NA
Burundi	Hipposideros cyclops	0	0	0	NA
Burundi	Otomys denti	0	0	0	NA
Burundi	Redunca redunca	0	0	0	NA
Burundi	Kobus ellipsiprymnus	0	0	0	NA
Burundi	Cephalophus weynsi	0	0	0	NA
Burundi	Papio cynocephalus	1	0	0	A
Burundi	Cricetomys emini	0	0	0	NA
Burundi	Felis silvestris	0	0	0	NA
Burundi	Cephalophus silvicultor	0	0	0	NA
Burundi	Petrodromus tetradactylus	0	0	0	NA
Burundi	Lavia frons	0	0	0	NA
Burundi	Otomys tropicalis	0	1	0	NA
Cambodia	Capricornis milneedwardsii	1	1	0	AB
Cambodia	Dendrogale murina	0	0	0	NA
Cambodia	Mustela kathiah	0	1	0	NA
Cambodia	Hipposideros armiger	0	1	0	NA
Cambodia	Chaerephon plicatus	0	1	0	NA
Cambodia	Glischropus tylopus	0	0	0	NA
Cambodia	Rhinolophus borneensis	0	0	0	NA
Cambodia	Pteropus lylei	1	1	0	AB
Cambodia	Pygathrix nemaeus	1	0	0	A
Cambodia	Nycticebus bengalensis	1	0	0	A
Cambodia	Pteropus hypomelanus	0	0	0	NA
Cambodia	Petaurista philippensis	0	1	0	NA
Cambodia	Catopuma temminckii	0	0	0	NA
Cambodia	Rhinolophus malayanus	0	1	0	NA
Cambodia	Rusa unicolor	0	1	0	NA
Cambodia	Manis javanica	1	1	0	AB
Cambodia	Trachypithecus germaini	1	0	0	A
Cambodia	Saccolaimus saccolaimus	1	0	0	A
Cambodia	Herpestes javanicus	1	1	0	AB
Cambodia	Tupaia belangeri	0	1	0	NA
Cambodia	Ursus thibetanus	1	1	0	AB
Cambodia	Callosciurus finlaysonii	1	1	0	AB
Cambodia	Macaca arctoides	1	0	0	A
Cambodia	Hipposideros diadema	0	1	0	NA
Cambodia	Axis porcinus	1	0	0	A
Cambodia	Prionailurus bengalensis	0	1	0	NA
Cambodia	Coelops frithii	0	0	0	NA
Cambodia	Suncus murinus	0	1	0	NA
Cambodia	Tragulus kanchil	1	1	0	AB
Cambodia	Rhinolophus affinis	0	1	0	NA
Cambodia	Lepus peguensis	0	1	0	NA
Cambodia	Kerivoula picta	0	1	0	NA
Cambodia	Hesperoptenus blanfordi	0	0	0	NA
Cambodia	Pardofelis marmorata	0	0	0	NA
Cambodia	Hystrix brachyura	0	1	0	NA
Cambodia	Viverricula indica	0	1	0	NA
Cambodia	Herpestes urva	1	1	0	AB
Cambodia	Leopoldamys sabanus	0	0	0	NA
Cambodia	Macroglossus minimus	1	1	0	AB
Cambodia	Melogale personata	0	1	0	NA
Cambodia	Macroglossus sobrinus	0	1	0	NA
Cambodia	Callosciurus erythraeus	0	0	0	NA
Cambodia	Aonyx cinereus	0	0	0	NA
Cambodia	Rousettus amplexicaudatus	1	1	0	AB
Cambodia	Miniopterus magnater	0	1	0	NA
Cambodia	Rattus exulans	0	1	0	NA
Cambodia	Helarctos malayanus	1	1	0	AB
Cambodia	Macaca assamensis	0	0	0	NA
Cambodia	Rhinolophus acuminatus	1	1	0	AB
Cambodia	Megaderma spasma	0	1	0	NA
Cambodia	Eonycteris spelaea	0	1	0	NA
Cambodia	Nycticebus pygmaeus	1	1	0	AB
Cambodia	Paradoxurus hermaphroditus	0	1	0	NA
Cambodia	Bos javanicus	1	0	0	A
Cambodia	Hylomys suillus	0	0	0	NA
Cambodia	Panthera pardus	0	0	0	NA
Cambodia	Canis aureus	0	1	0	NA
Cambodia	Sus scrofa	0	1	0	NA
Cambodia	Cynopterus brachyotis	1	1	0	AB
Cambodia	Muntiacus vuquangensis	1	0	0	A
Cambodia	Rhizomys pruinosus	0	0	0	NA
Cambodia	Rhinolophus marshalli	0	0	0	NA
Cambodia	Hylopetes spadiceus	1	0	0	A
Cambodia	Pygathrix nigripes	1	1	0	AB
Cambodia	Arctictis binturong	0	1	0	NA
Cambodia	Macaca fascicularis	1	1	0	AB
Cambodia	Hipposideros larvatus	0	1	0	NA
Cambodia	Kerivoula hardwickii	0	1	0	NA
Cambodia	Ratufa bicolor	0	0	0	NA
Cambodia	Phoniscus jagorii	0	0	0	NA
Cambodia	Taphozous theobaldi	0	0	0	NA
Cambodia	Niviventer langbianis	0	0	0	NA
Cambodia	Rhinolophus shameli	0	1	0	NA
Cambodia	Taphozous melanopogon	0	1	0	NA
Cambodia	Tamiops rodolphii	0	1	0	NA
Cambodia	Prionailurus viverrinus	0	0	0	NA
Cambodia	Cynopterus sphinx	0	1	0	NA
Cambodia	Myotis hasseltii	0	1	0	NA
Cambodia	Rhinolophus macrotis	0	0	0	NA
Cambodia	Miniopterus pusillus	0	1	0	NA
Cambodia	Mus shortridgei	0	0	0	NA
Cambodia	Melogale moschata	1	0	0	A
Cambodia	Arctogalidia trivirgata	0	1	0	NA
Cambodia	Rucervus eldii	1	1	0	AB
Cambodia	Macaca leonina	1	0	0	A
Cambodia	Neofelis nebulosa	0	0	0	NA
Cambodia	Rattus losea	0	1	0	NA
Cambodia	Kerivoula papillosa	0	0	0	NA
Cambodia	Lutra lutra	0	0	0	NA
Cambodia	Myotis horsfieldii	0	1	0	NA
Cambodia	Maxomys surifer	0	1	0	NA
Cambodia	Panthera tigris	1	0	0	A
Cambodia	Callosciurus caniceps	0	0	0	NA
Cambodia	Rattus andamanensis	0	1	0	NA
Cambodia	Hipposideros galeritus	0	1	0	NA
Cambodia	Elephas maximus	0	1	0	NA
Cambodia	Hipposideros bicolor	0	0	0	NA
Cambodia	Berylmys berdmorei	0	0	0	NA
Cambodia	Leopoldamys edwardsi	0	0	0	NA
Cambodia	Niviventer tenaster	0	0	0	NA
Cambodia	Martes flavigula	0	1	0	NA
Cambodia	Lutrogale perspicillata	0	0	0	NA
Cambodia	Taphozous longimanus	0	1	0	NA
Cambodia	Pteropus vampyrus	1	1	0	AB
Cambodia	Viverra zibetha	0	1	0	NA
Cambodia	Arctonyx collaris	0	1	0	NA
Cambodia	Hylobates pileatus	1	0	0	A
Cambodia	Rhinolophus stheno	0	0	0	NA
Cambodia	Lutra sumatrana	1	0	0	A
Cambodia	Menetes berdmorei	0	1	0	NA
Cambodia	Rousettus leschenaultii	0	1	0	NA
Cambodia	Rattus argentiventer	1	1	0	AB
Cambodia	Chiropodomys gliroides	0	0	0	NA
Cambodia	Rhinolophus pearsonii	0	0	0	NA
Cambodia	Viverra megaspila	1	1	0	AB
Cambodia	Bandicota savilei	0	1	0	NA
Cambodia	Myotis rosseti	0	1	0	NA
Cambodia	Prionodon pardicolor	0	1	0	NA
Cambodia	Tamiops maritimus	0	0	0	NA
Cambodia	Rhinolophus thomasi	0	0	0	NA
Cambodia	Megaerops niphanae	0	1	0	NA
Cambodia	Atherurus macrourus	0	0	0	NA
Cambodia	Dremomys rufigenis	0	0	0	NA
Cambodia	Rhizomys sumatrensis	0	1	0	NA
Cambodia	Chiromyscus chiropus	0	0	0	NA
Cambodia	Nomascus gabriellae	1	0	0	A
Cambodia	Cuon alpinus	0	0	0	NA
Cambodia	Cannomys badius	0	1	0	NA
Cambodia	Otomops wroughtoni	0	0	0	NA
Cambodia	Euroscaptor klossi	0	0	0	NA
Cambodia	Bos sauveli	1	0	0	A
Cameroon	Protoxerus stangeri	0	1	0	NA
Cameroon	Funisciurus anerythrus	0	0	0	NA
Cameroon	Sylvisorex johnstoni	0	0	0	NA
Cameroon	Cercopithecus mona	1	1	0	AB
Cameroon	Epomophorus gambianus	0	0	0	NA
Cameroon	Hystrix cristata	0	1	0	NA
Cameroon	Graphiurus lorraineus	0	1	0	NA
Cameroon	Panthera leo	0	0	0	NA
Cameroon	Scotonycteris ophiodon	0	0	0	NA
Cameroon	Allenopithecus nigroviridis	1	0	0	A
Cameroon	Genetta servalina	0	0	0	NA
Cameroon	Giraffa camelopardalis	1	0	0	A
Cameroon	Mops petersoni	0	0	0	NA
Cameroon	Tragelaphus eurycerus	0	1	0	NA
Cameroon	Neotragus batesi	0	1	0	NA
Cameroon	Hipposideros fuliginosus	0	0	0	NA
Cameroon	Cephalophus callipygus	0	1	0	NA
Cameroon	Mops spurrelli	0	0	0	NA
Cameroon	Lissonycteris angolensis	0	1	0	NA
Cameroon	Mandrillus leucophaeus	1	0	0	A
Cameroon	Micropteropus pusillus	0	1	0	NA
Cameroon	Deomys ferrugineus	0	0	0	NA
Cameroon	Herpestes ichneumon	0	0	0	NA
Cameroon	Colobus satanas	1	0	0	A
Cameroon	Arctocebus calabarensis	0	1	0	NA
Cameroon	Arctocebus aureus	0	0	0	NA
Cameroon	Paraxerus poensis	0	1	0	NA
Cameroon	Syncerus caffer	0	0	0	NA
Cameroon	Zenkerella insignis	0	0	0	NA
Cameroon	Aethomys stannarius	0	1	0	NA
Cameroon	Erythrocebus patas	1	1	0	AB
Cameroon	Dendrohyrax dorsalis	1	0	0	A
Cameroon	Panthera pardus	0	0	0	NA
Cameroon	Lophocebus albigena	1	0	0	A
Cameroon	Cercopithecus nictitans	1	1	0	AB
Cameroon	Potamochoerus porcus	0	1	0	NA
Cameroon	Idiurus zenkeri	0	0	0	NA
Cameroon	Vulpes pallida	0	1	0	NA
Cameroon	Cephalophus dorsalis	0	1	0	NA
Cameroon	Myopterus daubentonii	0	0	0	NA
Cameroon	Genetta thierryi	0	0	0	NA
Cameroon	Praomys tullbergi	0	0	0	NA
Cameroon	Arvicanthis niloticus	0	1	0	NA
Cameroon	Poiana richardsonii	0	0	0	NA
Cameroon	Nycteris gambiensis	0	0	0	NA
Cameroon	Ourebia ourebi	0	0	0	NA
Cameroon	Potamogale velox	0	0	0	NA
Cameroon	Mylomys dybowskii	0	0	0	NA
Cameroon	Crocidura nigeriae	0	0	0	NA
Cameroon	Cercocebus agilis	1	1	0	AB
Cameroon	Alcelaphus buselaphus	1	1	0	AB
Cameroon	Funisciurus pyrropus	0	1	0	NA
Cameroon	Ictonyx libycus	0	0	0	NA
Cameroon	Hyemoschus aquaticus	0	0	0	NA
Cameroon	Eudorcas rufifrons	0	1	0	NA
Cameroon	Atherurus africanus	0	1	0	NA
Cameroon	Pan troglodytes	1	0	0	A
Cameroon	Tragelaphus spekii	0	0	0	NA
Cameroon	Chlorocebus tantalus	1	1	0	AB
Cameroon	Crocidura grandiceps	0	0	0	NA
Cameroon	Nandinia binotata	0	1	0	NA
Cameroon	Herpestes naso	0	0	0	NA
Cameroon	Mellivora capensis	0	0	0	NA
Cameroon	Damaliscus lunatus	0	0	0	NA
Cameroon	Heliosciurus rufobrachium	0	1	0	NA
Cameroon	Cercopithecus erythrotis	1	0	0	A
Cameroon	Anomalurus beecrofti	0	1	0	NA
Cameroon	Sylvisorex isabellae	0	0	0	NA
Cameroon	Cephalophus nigrifrons	0	0	0	NA
Cameroon	Neoromicia brunnea	0	0	0	NA
Cameroon	Crocuta crocuta	1	0	0	A
Cameroon	Euoticus pallidus	1	1	0	AB
Cameroon	Rhinolophus hillorum	0	0	0	NA
Cameroon	Atilax paludinosus	0	0	0	NA
Cameroon	Anomalurus pusillus	0	0	0	NA
Cameroon	Cephalophus ogilbyi	0	0	0	NA
Cameroon	Miopithecus ogouensis	0	1	0	NA
Cameroon	Cercopithecus neglectus	1	0	0	A
Cameroon	Gorilla gorilla	1	0	0	A
Cameroon	Colobus guereza	1	1	0	AB
Cameroon	Papio anubis	1	1	0	AB
Cameroon	Kobus kob	0	0	0	NA
Cameroon	Cephalophus leucogaster	0	0	0	NA
Cameroon	Epixerus ebii	0	0	0	NA
Cameroon	Xerus erythropus	0	1	0	NA
Cameroon	Mastomys kollmannspergeri	0	1	0	NA
Cameroon	Euoticus elegantulus	0	1	0	NA
Cameroon	Saccolaimus peli	0	0	0	NA
Cameroon	Myosciurus pumilio	0	0	0	NA
Cameroon	Kerivoula smithii	0	0	0	NA
Cameroon	Funisciurus leucogenys	0	0	0	NA
Cameroon	Nanonycteris veldkampii	0	1	0	NA
Cameroon	Galago senegalensis	1	0	0	A
Cameroon	Crocidura virgata	0	0	0	NA
Cameroon	Prionomys batesi	0	0	0	NA
Cameroon	Dasymys rufulus	0	0	0	NA
Cameroon	Tragelaphus scriptus	0	1	0	NA
Cameroon	Praomys morio	0	0	0	NA
Cameroon	Otomys burtoni	0	0	0	NA
Cameroon	Hipposideros cyclops	0	0	0	NA
Cameroon	Paraxerus cooperi	0	0	0	NA
Cameroon	Otomys occidentalis	0	0	0	NA
Cameroon	Crocidura lamottei	0	0	0	NA
Cameroon	Hypsignathus monstrosus	0	0	0	NA
Cameroon	Bdeogale nigripes	0	0	0	NA
Cameroon	Cephalophus rufilatus	0	1	0	NA
Cameroon	Piliocolobus preussi	1	0	0	A
Cameroon	Redunca redunca	0	0	0	NA
Cameroon	Mops congicus	0	0	0	NA
Cameroon	Kobus ellipsiprymnus	0	0	0	NA
Cameroon	Myonycteris torquata	0	1	0	NA
Cameroon	Genetta cristata	0	1	0	NA
Cameroon	Idiurus macrotis	0	0	0	NA
Cameroon	Cercocebus torquatus	1	0	0	A
Cameroon	Heliosciurus gambianus	0	1	0	NA
Cameroon	Cricetomys emini	0	0	0	NA
Cameroon	Funisciurus lemniscatus	0	0	0	NA
Cameroon	Cercopithecus cephus	1	1	0	AB
Cameroon	Epomops franqueti	0	1	0	NA
Cameroon	Myosorex rumpii	0	0	0	NA
Cameroon	Hipposideros curtus	0	0	0	NA
Cameroon	Caracal caracal	0	0	0	NA
Cameroon	Funisciurus isabella	0	0	0	NA
Cameroon	Dasymys foxi	0	0	0	NA
Cameroon	Glauconycteris poensis	0	0	0	NA
Cameroon	Mandrillus sphinx	1	1	0	AB
Cameroon	Felis silvestris	0	0	0	NA
Cameroon	Cephalophus silvicultor	0	1	0	NA
Cameroon	Lavia frons	0	0	0	NA
Cameroon	Hippotragus equinus	0	0	0	NA
Cameroon	Graphiurus crassicaudatus	0	1	0	NA
Cameroon	Hyaena hyaena	0	0	0	NA
Canada	Castor canadensis	0	0	1	NA
Canada	Microtus richardsoni	0	0	1	NA
Canada	Mustela nivalis	0	1	1	NA
Canada	Mustela erminea	1	1	1	ABC
Canada	Vulpes lagopus	0	0	1	NA
Canada	Ursus arctos	1	1	1	ABC
Canada	Lontra canadensis	1	0	1	NA
Canada	Lepus europaeus	0	1	1	NA
Canada	Microtus ochrogaster	0	1	1	NA
Canada	Ochotona princeps	0	0	1	NA
Canada	Antilocapra americana	0	0	0	NA
Canada	Ursus americanus	0	1	1	NA
Canada	Canis latrans	0	1	1	NA
Canada	Canis lupus	1	1	1	ABC
Canada	Ovis dalli	0	0	1	NA
Canada	Urocyon cinereoargenteus	0	1	1	NA
Canada	Microtus pinetorum	0	1	1	NA
Canada	Ondatra zibethicus	0	0	1	NA
Canada	Peromyscus leucopus	1	1	1	ABC
Canada	Sorex palustris	0	0	1	NA
Canada	Gulo gulo	0	0	1	NA
Canada	Zalophus californianus	0	0	1	NA
Canada	Oreamnos americanus	0	0	1	NA
Canada	Martes americana	0	0	1	NA
Canada	Phenacomys intermedius	0	0	1	NA
Canada	Ovis canadensis	0	0	1	NA
Canada	Mustela frenata	0	0	1	NA
Canada	Rangifer tarandus	0	0	1	NA
Canada	Martes pennanti	0	0	1	NA
Canada	Sorex cinereus	0	0	1	NA
Canada	Microtus pennsylvanicus	0	1	1	NA
Canada	Puma concolor	0	0	1	NA
Canada	Ursus maritimus	0	0	1	NA
Canada	Odocoileus hemionus	1	1	1	ABC
Canada	Phoca vitulina	0	0	1	NA
Canada	Pusa hispida	0	0	1	NA
Canada	Sorex vagrans	0	0	1	NA
Canada	Ovibos moschatus	0	0	0	NA
Canada	Peromyscus maniculatus	1	1	1	ABC
Canada	Vulpes vulpes	1	1	1	ABC
Canada	Enhydra lutris	0	0	1	NA
Canada	Mephitis mephitis	0	1	1	NA
Canada	Alces alces	0	1	1	NA
Canada	Odocoileus virginianus	1	1	1	ABC
Canada	Microtus oeconomus	0	0	1	NA
Canada	Callorhinus ursinus	0	0	1	NA
Canada	Neovison vison	1	0	1	NA
Canada	Bison bison	0	1	1	NA
Central African Republic	Protoxerus stangeri	0	0	0	NA
Central African Republic	Funisciurus anerythrus	0	0	0	NA
Central African Republic	Sylvisorex johnstoni	0	0	0	NA
Central African Republic	Epomophorus gambianus	0	0	0	NA
Central African Republic	Hystrix cristata	0	0	0	NA
Central African Republic	Graphiurus lorraineus	0	0	0	NA
Central African Republic	Panthera leo	0	0	0	NA
Central African Republic	Allenopithecus nigroviridis	1	0	0	A
Central African Republic	Genetta servalina	0	0	0	NA
Central African Republic	Giraffa camelopardalis	1	0	0	A
Central African Republic	Tragelaphus strepsiceros	0	0	0	NA
Central African Republic	Tragelaphus eurycerus	0	0	0	NA
Central African Republic	Neotragus batesi	0	0	0	NA
Central African Republic	Hipposideros fuliginosus	0	0	0	NA
Central African Republic	Cephalophus callipygus	0	0	0	NA
Central African Republic	Mops spurrelli	0	0	0	NA
Central African Republic	Lissonycteris angolensis	0	0	0	NA
Central African Republic	Micropteropus pusillus	0	0	0	NA
Central African Republic	Deomys ferrugineus	0	0	0	NA
Central African Republic	Herpestes ichneumon	0	0	0	NA
Central African Republic	Poelagus marjorita	0	0	0	NA
Central African Republic	Arctocebus aureus	0	0	0	NA
Central African Republic	Paraxerus poensis	0	0	0	NA
Central African Republic	Syncerus caffer	0	0	0	NA
Central African Republic	Zenkerella insignis	0	0	0	NA
Central African Republic	Erythrocebus patas	1	0	0	A
Central African Republic	Dendrohyrax dorsalis	1	0	0	A
Central African Republic	Panthera pardus	0	0	0	NA
Central African Republic	Lophocebus albigena	1	0	0	A
Central African Republic	Cercopithecus nictitans	1	0	0	A
Central African Republic	Ceratotherium simum	0	0	0	NA
Central African Republic	Potamochoerus porcus	0	0	0	NA
Central African Republic	Idiurus zenkeri	0	0	0	NA
Central African Republic	Cephalophus dorsalis	0	0	0	NA
Central African Republic	Myopterus daubentonii	0	0	0	NA
Central African Republic	Genetta thierryi	0	0	0	NA
Central African Republic	Arvicanthis niloticus	0	0	0	NA
Central African Republic	Poiana richardsonii	0	0	0	NA
Central African Republic	Ourebia ourebi	0	0	0	NA
Central African Republic	Potamogale velox	0	0	0	NA
Central African Republic	Mylomys dybowskii	0	0	0	NA
Central African Republic	Cercocebus agilis	1	0	0	A
Central African Republic	Alcelaphus buselaphus	1	0	0	A
Central African Republic	Funisciurus pyrropus	0	0	0	NA
Central African Republic	Hyemoschus aquaticus	0	0	0	NA
Central African Republic	Eudorcas rufifrons	0	0	0	NA
Central African Republic	Atherurus africanus	0	0	0	NA
Central African Republic	Pan troglodytes	1	0	0	A
Central African Republic	Tragelaphus spekii	0	0	0	NA
Central African Republic	Chlorocebus tantalus	1	0	0	A
Central African Republic	Cercopithecus ascanius	1	0	0	A
Central African Republic	Nandinia binotata	0	0	0	NA
Central African Republic	Herpestes naso	0	0	0	NA
Central African Republic	Mellivora capensis	0	0	0	NA
Central African Republic	Damaliscus lunatus	0	0	0	NA
Central African Republic	Heliosciurus rufobrachium	0	0	0	NA
Central African Republic	Anomalurus beecrofti	0	0	0	NA
Central African Republic	Cephalophus nigrifrons	0	0	0	NA
Central African Republic	Crocuta crocuta	1	0	0	A
Central African Republic	Atilax paludinosus	0	0	0	NA
Central African Republic	Potamochoerus larvatus	0	0	0	NA
Central African Republic	Cercopithecus neglectus	1	0	0	A
Central African Republic	Gorilla gorilla	1	0	0	A
Central African Republic	Colobus guereza	1	0	0	A
Central African Republic	Papio anubis	1	0	0	A
Central African Republic	Kobus kob	0	0	0	NA
Central African Republic	Cephalophus leucogaster	0	0	0	NA
Central African Republic	Xerus erythropus	0	0	0	NA
Central African Republic	Mastomys kollmannspergeri	0	0	0	NA
Central African Republic	Euoticus elegantulus	0	0	0	NA
Central African Republic	Mops trevori	0	0	0	NA
Central African Republic	Saccolaimus peli	0	0	0	NA
Central African Republic	Kerivoula smithii	0	0	0	NA
Central African Republic	Funisciurus leucogenys	0	0	0	NA
Central African Republic	Nanonycteris veldkampii	0	0	0	NA
Central African Republic	Galago senegalensis	1	0	0	A
Central African Republic	Prionomys batesi	0	0	0	NA
Central African Republic	Tragelaphus scriptus	0	0	0	NA
Central African Republic	Hipposideros cyclops	0	0	0	NA
Central African Republic	Hypsignathus monstrosus	0	0	0	NA
Central African Republic	Bdeogale nigripes	0	0	0	NA
Central African Republic	Cephalophus rufilatus	0	0	0	NA
Central African Republic	Redunca redunca	0	0	0	NA
Central African Republic	Mops congicus	0	0	0	NA
Central African Republic	Kobus ellipsiprymnus	0	0	0	NA
Central African Republic	Myonycteris torquata	0	0	0	NA
Central African Republic	Cephalophus weynsi	0	0	0	NA
Central African Republic	Heliosciurus gambianus	0	0	0	NA
Central African Republic	Cricetomys emini	0	0	0	NA
Central African Republic	Funisciurus lemniscatus	0	0	0	NA
Central African Republic	Cercopithecus cephus	1	0	0	A
Central African Republic	Epomops franqueti	0	0	0	NA
Central African Republic	Caracal caracal	0	0	0	NA
Central African Republic	Funisciurus isabella	0	0	0	NA
Central African Republic	Glauconycteris poensis	0	0	0	NA
Central African Republic	Felis silvestris	0	0	0	NA
Central African Republic	Cephalophus silvicultor	0	0	0	NA
Central African Republic	Lavia frons	0	0	0	NA
Central African Republic	Hippotragus equinus	0	0	0	NA
Central African Republic	Hyaena hyaena	0	0	0	NA
Chad	Funisciurus anerythrus	0	0	0	NA
Chad	Epomophorus gambianus	0	0	0	NA
Chad	Hystrix cristata	0	1	0	NA
Chad	Panthera leo	0	0	0	NA
Chad	Giraffa camelopardalis	1	0	0	A
Chad	Tragelaphus strepsiceros	0	0	0	NA
Chad	Nanger dama	1	0	0	A
Chad	Addax nasomaculatus	0	0	0	NA
Chad	Lissonycteris angolensis	0	1	0	NA
Chad	Micropteropus pusillus	0	1	0	NA
Chad	Herpestes ichneumon	0	0	0	NA
Chad	Vulpes zerda	0	0	0	NA
Chad	Syncerus caffer	0	0	0	NA
Chad	Felis margarita	0	0	0	NA
Chad	Erythrocebus patas	1	1	0	AB
Chad	Panthera pardus	0	0	0	NA
Chad	Potamochoerus porcus	0	1	0	NA
Chad	Vulpes pallida	0	0	0	NA
Chad	Cephalophus dorsalis	0	0	0	NA
Chad	Myopterus daubentonii	0	0	0	NA
Chad	Genetta thierryi	0	0	0	NA
Chad	Arvicanthis niloticus	0	0	0	NA
Chad	Ourebia ourebi	0	0	0	NA
Chad	Alcelaphus buselaphus	1	1	0	AB
Chad	Ictonyx libycus	0	0	0	NA
Chad	Eudorcas rufifrons	0	0	0	NA
Chad	Tragelaphus spekii	0	0	0	NA
Chad	Chlorocebus tantalus	1	1	0	AB
Chad	Gazella dorcas	1	0	0	A
Chad	Mellivora capensis	0	0	0	NA
Chad	Damaliscus lunatus	0	0	0	NA
Chad	Gazella leptoceros	0	0	0	NA
Chad	Crocuta crocuta	1	0	0	A
Chad	Atilax paludinosus	0	0	0	NA
Chad	Colobus guereza	1	1	0	AB
Chad	Papio anubis	1	1	0	AB
Chad	Kobus kob	0	0	0	NA
Chad	Xerus erythropus	0	1	0	NA
Chad	Mastomys kollmannspergeri	0	1	0	NA
Chad	Galago senegalensis	1	0	0	A
Chad	Ammotragus lervia	0	0	0	NA
Chad	Tragelaphus scriptus	0	1	0	NA
Chad	Gerbillus nancillus	0	0	0	NA
Chad	Gerbillus pyramidum	0	0	0	NA
Chad	Mus mattheyi	0	0	0	NA
Chad	Cephalophus rufilatus	0	1	0	NA
Chad	Redunca redunca	0	0	0	NA
Chad	Kobus ellipsiprymnus	0	0	0	NA
Chad	Gerbillus gerbillus	0	0	0	NA
Chad	Gerbillus nanus	0	0	0	NA
Chad	Heliosciurus gambianus	0	1	0	NA
Chad	Caracal caracal	0	0	0	NA
Chad	Felis silvestris	0	0	0	NA
Chad	Cephalophus silvicultor	0	1	0	NA
Chad	Lavia frons	0	0	0	NA
Chad	Hippotragus equinus	0	0	0	NA
Chad	Hyaena hyaena	0	0	0	NA
Chile	Castor canadensis	0	0	0	NA
Chile	Lepus europaeus	0	1	1	NA
Chile	Rattus exulans	0	0	0	NA
Chile	Hippocamelus antisensis	0	0	0	NA
Chile	Hippocamelus bisulcus	0	1	1	NA
Chile	Chinchilla lanigera	0	0	0	NA
Chile	Vicugna vicugna	0	0	0	NA
Chile	Puma concolor	0	0	1	NA
Chile	Pudu puda	0	0	1	NA
Chile	Odocoileus virginianus	1	0	0	A
China	Capricornis milneedwardsii	1	1	0	AB
China	Alticola roylei	0	0	0	NA
China	Myodes shanseius	0	0	0	NA
China	Mustela kathiah	0	1	0	NA
China	Chrotogale owstoni	0	1	0	NA
China	Hipposideros armiger	0	1	0	NA
China	Chaerephon plicatus	0	1	0	NA
China	Petaurista elegans	0	0	0	NA
China	Philetor brachypterus	0	0	0	NA
China	Mustela nivalis	0	1	0	NA
China	Glischropus tylopus	0	0	0	NA
China	Cricetus cricetus	0	0	0	NA
China	Mustela erminea	1	1	0	AB
China	Pteropus lylei	1	0	0	A
China	Muntiacus gongshanensis	0	0	0	NA
China	Nycticebus bengalensis	1	0	0	A
China	Apodemus peninsulae	0	1	0	NA
China	Petaurista philippensis	0	1	0	NA
China	Catopuma temminckii	0	0	0	NA
China	Rhinolophus malayanus	0	1	0	NA
China	Nyctalus aviator	0	0	0	NA
China	Rusa unicolor	0	1	0	NA
China	Manis javanica	1	1	0	AB
China	Falsistrellus mordax	0	0	0	NA
China	Ursus arctos	1	1	0	AB
China	Lasiopodomys brandtii	0	0	0	NA
[truncated: 9,276 more rows]
